# 1           **Membrane-Tethered Mucin 1 is Stimulated by Interferon in Multiple Cell Types and** 2           **Antagonizes Influenza A Virus Infection in Human Airway Epithelium**

3  
4  
5   Ethan Iverson<sup>1</sup>, Kira Griswold<sup>1</sup>, Daniel Song<sup>2</sup>, Talita B. Gagliardi<sup>1</sup>, Kajal Hamidzadeh<sup>1</sup>, Mehmet  
6   Kesimer<sup>3</sup>, Sanju Sinha<sup>4,5</sup>, Melissa Perry<sup>1</sup>, Gregg A. Duncan<sup>2</sup>, and Margaret A. Scull<sup>1\*</sup>

7  
8  
9   <sup>1</sup>Department of Cell Biology & Molecular Genetics, Maryland Pathogen Research Institute, University  
10   of Maryland, College Park, MD, USA.

11   <sup>2</sup> Fischell Department of Bioengineering, University of Maryland, College Park, MD, USA.

12   <sup>3</sup> Marsico Lung Institute, University of North Carolina, Chapel Hill, NC, USA.

13   <sup>4</sup> Cancer Data Science Laboratory, National Cancer Institute, National Institutes of Health, Bethesda,  
14   MD, USA.

15   <sup>5</sup> Center for Bioinformatics and Computational Biology, University of Maryland, College Park, MD, USA.

16  
17   \* corresponding author: [scull@umd.edu](mailto:scull@umd.edu)

18  
19   **Running title:** MUC1 is stimulated by interferon and slows influenza virus infection

20  
21  
22   **Keywords:** influenza virus, mucin, interferon, airway epithelium, macrophage

## 24 **Abstract**

25 Influenza A virus (IAV) causes seasonal epidemics and periodic pandemics, resulting in significant  
26 morbidity and mortality in the human population. Tethered mucin 1 (MUC1) is highly expressed in  
27 airway epithelium, the primary site of IAV replication, and also by other cell types that influence IAV  
28 infection, including macrophages. MUC1 has the potential to influence infection dynamics through  
29 physical interactions and/or signaling activity, and recent work suggests MUC1 acts as a releasable  
30 decoy receptor and anti-inflammatory molecule during IAV infection. Still, the modulation of MUC1 and  
31 its impact during viral pathogenesis remains unclear. Thus, we sought to further investigate the interplay  
32 between MUC1 and IAV in an *in vitro* model of primary human airway epithelium (HAE). Our data  
33 indicate that a recombinant IAV hemagglutinin (H3) and H3N2 virus can bind endogenous HAE MUC1.  
34 We find that infection of HAE cultures with H1N1 or H3N2 IAV strains does not trigger enhanced MUC1  
35 shedding, but instead stimulates an increase in cell-associated MUC1 protein. We observed a similar  
36 increase after stimulation with either type I or type III interferon (IFN); however, inhibition of IFN  
37 signaling during H1N1 infection only partially abrogated this increase, indicating multiple soluble factors  
38 contribute to MUC1 upregulation during the antiviral response. We expanded these findings and  
39 demonstrate that in addition to HAE, primary human monocyte-derived macrophages also upregulate  
40 MUC1 protein in response to both IFN treatment and conditioned media from IAV-infected HAE  
41 cultures. We then developed HAE genetically depleted for MUC1 to determine its impact on IAV  
42 pathogenesis, finding that MUC1 knock-out cultures exhibited enhanced viral growth compared to  
43 control cultures. Together, our data support a model whereby MUC1 antagonizes productive uptake of  
44 IAV in HAE. Infection then stimulates MUC1 expression on multiple cell types through IFN-dependent  
45 and -independent mechanisms that may further impact infection dynamics.

## 48 **Author Summary**

49 The mucosal surface of the respiratory epithelium is an important site of first contact for viral respiratory  
50 pathogens. Large and heavily glycosylated molecules known as tethered mucins extend from the cell  
51 surface and may physically restrict access to underlying cells. Recently, one of these tethered mucins,  
52 MUC1, has also been shown to influence cell signaling and inflammation. Still, despite its abundance  
53 in the airway and multifunctional capability, the role of MUC1 during influenza virus infection in the  
54 human respiratory tract remains unclear. Here, we demonstrate that influenza virus directly interacts  
55 with MUC1 in a physiologically-relevant model of human airway epithelium and find that MUC1 protein  
56 expression is elevated throughout the epithelium and in primary human monocyte-derived  
57 macrophages in response to important antiviral signals produced during infection. Using genetically-  
58 modified human airway cultures lacking MUC1, we then provide evidence of more efficient influenza  
59 virus infection in the absence of this mucin. Our data suggest that MUC1 not only physically restricts  
60 influenza virus uptake, but also represents a dynamic component of the host response that acts to  
61 further stem viral spread.

## 62 **Introduction**

63 The respiratory epithelium encodes large and extensively glycosylated proteins, termed mucins,  
64 to maintain airway surface hydration and protect the underlying cells from environmental insults, such  
65 as respiratory viruses [1,2]. While some mucins are secreted and form a mucus gel, others – the aptly  
66 named “tethered” mucins – remain anchored to the apical epithelial cell surface, giving rise to the  
67 periciliary layer (PCL) [1–3]. The PCL serves as a platform for overlying secreted mucins, allowing  
68 ciliary action to propel the secreted mucus gel in a process known as mucociliary clearance (MCC)  
69 [4,5]. Additionally, tethered mucins of the PCL represent steric obstacles to frustrate further access to  
70 the underlying epithelium [2]. In addition to the bulky extracellular domain (ED) typical of tethered  
71 mucins, the highly abundant mucin 1 (MUC1) features a highly-conserved cytoplasmic tail (CT) with  
72 many known interacting partners including kinases and adapter proteins involved in signal transduction  
73 [3,6,7]. MUC1-CT can be differentially phosphorylated [8,9], and translocated [10–12], supporting an  
74 important function outside its canonical representation among the PCL.

75 MUC1/Muc1 (humans/mice) has been implicated in various aspects of both bacterial and viral  
76 infections. For example, the genetic disruption of *Muc1* is associated with elevated inflammation and  
77 faster *Pseudomonas aeruginosa* clearance [6], yet results in more severe *Streptococcus pneumoniae*  
78 infection [13]. Adenoviral infection in *Muc1*<sup>-/-</sup> mice is modestly increased with no significant inflammatory  
79 differences in the lung [14] and adenoviral vector gene transfer efficiency *in vitro* and *in vivo* is inhibited  
80 by MUC1/Muc1 expression [15,16], suggesting that MUC1 restricts adenovirus by acting as a physical  
81 barrier. Outside the airway, MUC1 has been shown to be an attachment factor for *Helicobacter pylori*  
82 [17] while the presence of MUC1 in breast milk is protective against human immunodeficiency virus  
83 transmission [18]. MUC1 has also been shown to suppress respiratory syncytial virus-induced  
84 inflammation *in vitro* by forming a negative feedback loop with tumor necrosis factor (TNFα) [19] and  
85 altered expression of MUC1 has been described in response to multiple inflammatory stimuli [20],  
86 suggesting it might play a universal and dynamic role during insult by numerous different pathogens

87 [21,22]. Notably, no consensus on MUC1 function or dynamics during infection is reflected in these  
88 studies.

89 Influenza A virus (IAV) infects the human airway epithelium (HAE) [23] and causes an estimated  
90 annual burden of 290,000-645,000 deaths worldwide in non-pandemic years [24]. To gain access to  
91 airway epithelial cells, IAV must first penetrate the secreted mucus and underlying PCL barriers.  
92 Subsequent endocytic uptake into epithelial cells is mediated through interactions between the viral  
93 attachment protein hemagglutinin and glycans with terminal sialic acid linkages on the cell surface [25].  
94 While it is known that sialic acid recognition heavily impacts cellular tropism and epizootic potential [26],  
95 the extent and consequence of IAV attachment to sialic acid on specific host proteins is unclear [27]. A  
96 recent report suggests that IAV can interact with the extracellular domain of MUC1 and that this  
97 interaction has important implications for pathogenesis *in vivo* [28]. However, it is not known if MUC1  
98 can restrict IAV access to well-differentiated epithelial cells, or if sialic acid-mediated interactions  
99 subvert a normally protective physical role and instead support IAV uptake. Additionally, it is not known  
100 how MUC1 expression is impacted during IAV pathogenesis of the respiratory epithelium and whether  
101 its immunomodulatory role is important in the context of IAV infection.

102 Here we investigate specific interactions between IAV and MUC1 in a physiologically-relevant  
103 model of HAE. Consistent with previous reports in cell lines [28], we show that IAV can interact with  
104 membrane-tethered MUC1 in HAE; however, in contrast to earlier findings, we find no evidence of IAV-  
105 mediated MUC1 shedding in several epithelial model systems. Our data instead indicate that MUC1 is  
106 upregulated in all HAE component cell types as well as primary human monocyte-derived (PMD)  
107 macrophages by soluble factors, including type I and type III interferons, produced during IAV infection.  
108 Then, using a novel *in vitro* HAE model system that is genetically deleted for MUC1, we demonstrate  
109 that depletion of MUC1 is pro-viral, leading to enhanced IAV replication and spread.

## 111 **Results**

112 **The IAV hemagglutinin protein binds MUC1 isolated from HAE apical secretions and co-**  
113 **localizes with MUC1 during infection.**

114 Recent work suggests that IAV can interact with MUC1 based on fluorescence microscopy and  
115 colocalization analysis in A549 cells [28]. Thus, we initially sought to determine if the IAV hemagglutinin  
116 protein binds MUC1 derived from an *in vitro* model of primary HAE as this system recapitulates  
117 important aspects of airway epithelial morphology and physiology including both secreted and tethered  
118 mucin expression [2,29] (**S1 Fig**). MUC1 is abundant at the apical surface of HAE and can be enriched  
119 and purified from apical secretions [2] that can also contain vesicles enriched with membrane-tethered  
120 mucins, including MUC1 [30].

121 MUC1 purification from HAE secretions was achieved by immunoprecipitation and subsequent  
122 interaction with influenza virus hemagglutinin protein was determined using a recombinant H3  
123 hemagglutinin following agarose gel electrophoresis. Detection of recombinant H3 hemagglutinin  
124 binding and anti-MUC1-ED reactivity in the same region of the membrane indicated a likely interaction  
125 between the viral attachment protein and this mucin molecule (**Fig 1A**). Another tethered mucin,  
126 MUC16, that was also previously identified in HAE secretions, was detected in the apical material but  
127 not in the immunoprecipitated conditions. These data confirmed that other mucins were not present  
128 and further support the conclusion that detection of recombinant hemagglutinin is indicative of  
129 hemagglutinin-MUC1 binding.

130 To determine if the hemagglutinin-MUC1 interaction occurs in the context of the native HAE  
131 microenvironment, we inoculated HAE cultures with  $\geq 5E5$  plaque forming units (PFU) of  
132 A/Udorn/307/72 and subsequently chilled them to 4°C so as to irreversibly stabilize virus adsorption  
133 and restrict cellular entry [31]. Next, we performed transmission electron microscopy with immunogold  
134 labeling to detect IAV H3 as well as MUC1-ED, allowing us to observe potential colocalization of these  
135 two molecules prior to cellular uptake. Consistent with previous reporting, we identified MUC1 at the  
136 apical surface primarily localized to microvilli [2]. IAV was also frequently in close proximity to

137 immunogold labelled MUC1 (**Fig 1B-E**), in line with our *in vitro* interaction and prior work in A549 cells  
138 [28]. Taken together, our results suggest that influenza virus interacts with MUC1 during the early  
139 stages of infection in a physiologically-relevant system that recapitulates the extracellular environment  
140 in the airway.

#### 142 **IAV replication in HAE is not associated with an increase in soluble MUC1.**

143 Given our results indicating HAE-MUC1 interacts with IAV hemagglutinin, we next sought to  
144 determine the consequence of this interaction. Previous work in CHO cells suggested that the  
145 ectodomain of ectopically-expressed MUC1 could act as a releasable decoy that is shed upon IAV  
146 binding to prevent subsequent infection of underlying cells [28]. To determine whether MUC1 is shed  
147 during viral challenge in the context of the airway PCL, we inoculated primary, well-differentiated HAE  
148 cultures with either A/PR/8/34 or A/Udorn/307/72 and quantified MUC1 and infectious virus in apical  
149 washes 24 hours post-infection (hpi; **Fig 2A and 2B**). Surprisingly, in contrast to previous observations,  
150 we found soluble MUC1 levels were either unchanged or reduced relative to mock-infected cultures.  
151 Specifically, infection with A/PR/8/34 did not result in a significant change in soluble MUC1 levels by  
152 24 hpi, despite reaching titers of 1.5E6 PFU per mL. A/Udorn/307/72 reached a higher titer of 3.4E6  
153 PFU per mL over the same time frame and was associated with a reduction in MUC1 protein in the  
154 apical washes.

155 To determine if a lack of MUC1 shedding after IAV challenge was an HAE-specific phenomenon,  
156 we executed a similar experiment in A549 cells expressing endogenous MUC1. Following a one hour  
157 incubation at 4°C to allow viral particles to bind to the cell surface, we removed the inoculum, returned  
158 the cultures to 37°C, and quantified MUC1 and infectious virus in cell culture supernatants 24 hours  
159 later (**S2 Fig**). Similar to our HAE results, neither infection with A/PR/8/32 nor A/Udorn/307/72 yielded  
160 an increase in soluble MUC1; indeed, lower levels of this mucin were detected in both cases. These

161 data corroborate our results in HAE and together suggest that MUC1 expressed endogenously in  
162 human airway cells is not shed during IAV challenge.

163  
164 **Cell-associated MUC1 levels are upregulated during IAV infection and after interferon**  
165 **treatment.**

166 As the reduction of soluble MUC1 levels following infection of human airway cells was  
167 unexpected, we sought to further characterize MUC1 dynamics in HAE after IAV challenge. Since  
168 previous reports have described an increase in MUC1 protein following IFN $\gamma$  exposure in other systems  
169 [32], and IAV infection of HAE triggers both type I and type III IFN [33], we quantified MUC1 gene  
170 expression and cell-associated MUC1 protein levels following IAV infection, or after treatment of HAE  
171 with IFN $\beta$ , IFN $\lambda$ 3, or TNF $\alpha$  (previously implicated in upregulating MUC1 [21,34]). Neither type I or type  
172 III IFN treatment (**Fig 3A** and **3B**) nor IAV infection (**Fig 3C**) triggered an increase in MUC1 transcripts  
173 above mock-treated controls, let alone a response typical of canonical interferon stimulated genes (**S3**  
174 **Fig**). However, type I and type III IFN, along with IAV, were able to stimulate production of MUC1  
175 protein similar to that seen with TNF $\alpha$  (**Fig 3D**). Furthermore, IAV-mediated upregulation of MUC1  
176 protein was at least partially IFN signaling-independent, as the addition of a Janus tyrosine kinase  
177 (JAK)1 inhibitor did not abolish this increased protein expression (**Fig 3D**).

178 In order to visualize which cells were expressing MUC1 after IFN challenge or IAV infection, we  
179 fixed cultures either 6 and 24 hours post-IFN treatment or 24 hpi and stained for MUC1 using standard  
180 immunohistochemical and *en face* immunofluorescence-based approaches. Surprisingly, despite a  
181 lack of protein expression in basal cell populations at baseline and a lack of mRNA upregulation after  
182 IFN treatment (**S1 Fig** and **Fig 3A**), we observed MUC1 protein in all HAE component cell types  
183 following IFN $\beta$  stimulation (**Fig 4A**). Infection of HAE with IAV led to increased expression of MUC1  
184 protein by 24 hpi in both infected and uninfected cells (**Fig 4B**). In line with this broad protein  
185 upregulation, both ciliated and non-ciliated cells had increased MUC1 protein as compared to



186 uninfected baseline conditions (**Fig 4C and 4D**). Together, our data show MUC1 protein expression is  
187 broadly increased in HAE after type I and III IFN exposure and IAV infection.

188  
189 **Soluble factors secreted by HAE during IAV infection upregulate MUC1 on primary human**  
190 **monocyte-derived macrophages.**

191 Beyond epithelial cells, MUC1 is known to be expressed by cells of the hematopoietic lineage  
192 [35–37], including macrophages [32], that play an important role during IAV infection. As we observed  
193 elevated MUC1 protein during IAV infection and after IFN treatment across HAE component cell types,  
194 we next determined the impact of host- and viral-derived factors likely present in epithelial tissue during  
195 IAV infection on MUC1 expression in macrophages. Following differentiation with either macrophage  
196 colony-stimulating factor (M-CSF) or granulocyte-macrophage colony-stimulating factor (GM-CSF; to  
197 better achieve alveolar-like macrophages) [38–40], we stimulated PMD macrophages with Poly I:C (a  
198 viral double-stranded RNA mimetic), inflammatory cytokine TNF $\alpha$ , or IFN $\beta$ . Only IFN $\beta$  resulted in a  
199 strong upregulation of MUC1 protein (**Fig 5A and S4 Fig**). Given these results with type I IFN and  
200 previous work demonstrating upregulation of MUC1 protein in macrophages in response to LPS, IFN $\gamma$   
201 (type II IFN), or a combination treatment [32], we next extended our analysis to determine if type III IFN  
202 stimulation was also sufficient for MUC1 protein expression. Western blot analysis of MUC1 expression  
203 after 24 and 48 hours confirmed that both type I and, to a lesser extent, type III were able to induce  
204 MUC1 expression (**Fig 5B**).

205 To further assess whether MUC1 upregulation was mediated by soluble factors produced in the  
206 context of infection, we infected HAE with 50,000 PFU of A/Udorn/307/72 and then transferred the  
207 virus-free basolateral medium [41] to naïve PMD macrophages (**Fig 5C and 5D**). While MUC1 protein  
208 was elevated by mock-conditioned medium, these levels were markedly increased in cultures receiving  
209 IAV-conditioned supernatant at both 24 and 48 hrs. These data indicate that IAV infection of HAE leads

210 to the secretion of soluble factors that have the potential to increase MUC1 levels on multiple cell types  
211 during infection *in vivo*.

### 213 **Generation of HAE cultures lacking MUC1.**

214 Given the ability of IAV to bind MUC1 during infection, and our observed changes in MUC1  
215 protein dynamics in both HAE and PMD macrophages as a consequence of IAV infection, we next  
216 sought to determine the impact of MUC1 on IAV replication. We utilized CRISPR/Cas9-mediated  
217 genome editing to achieve well-differentiated HAE cultures that were genetically knocked-out (KO) for  
218 MUC1. To do so, we cloned a single guide (sg)RNA targeting MUC1 (exon 5; **Fig 6A**), or no known  
219 sequence (non-targeting control), into a GFP-expressing lentiviral vector that also encodes the Cas9  
220 nuclease, transduced immortalized human airway epithelial cells (BCi-NS1.1; [42]), and sorted for GFP-  
221 positive cells prior to differentiation. Our data demonstrate on-target editing (**Fig 6B**), loss of MUC1  
222 protein (**Fig 6C**), and lack of overt histopathology in differentiated cultures (**Fig 6D**). Compared with  
223 control cultures, MCC was significantly reduced in MUC1-depleted cultures (**Fig 6E**); nonetheless,  
224 overall, MUC1 was not critical for HAE differentiation or survival, allowing for mechanistic dissection of  
225 its role in HAE.

### 227 **IAV challenge in HAE lacking MUC1 reveals altered infection dynamics.**

228 To determine how MUC1 depletion would impact IAV infection dynamics, we inoculated both  
229 MUC1 KO and control HAE cultures with 500 PFU A/Udorn/307/72 to allow for multiple rounds of  
230 infection and monitored both viral growth kinetics as well as spread throughout the culture by *en face*  
231 staining for viral antigen. Viral titers were significantly higher in MUC1 KO cultures compared with  
232 control cultures at both 12 and 24 hpi; however, this difference was lost by 48 hpi (**Fig 7B**). These data  
233 were consistent with immunostaining results that revealed a limited number of viral antigen-positive  
234 cells in control cultures at 12 hpi, while all MUC1 KO cultures had resolvable foci indicative of multicycle

235 replication by this same time point (**Fig 7A**). Image analysis performed on predetermined regions of  
236 infected cultures confirmed these observations, showing significantly more foci and a trend towards  
237 greater foci area at 12 hpi in MUC1 KO cultures compared with controls (**Fig 7C and 7D**). By 24 hpi,  
238 MUC1 KO cultures had extensive infection and individual foci could no longer be resolved (**Fig 7A**);  
239 this was reflected in a greater percentage of viral antigen-positive epithelium, though no time point  
240 yielded statistically significant results (**Fig 7E**). Control cultures at 24 hpi had increased infection from  
241 12 hpi, but much less so than KO comparators (**Fig 7E**). By 48 hpi both sets of cultures were extensively  
242 infected (**Fig 7A and Fig 7E**) and the integrity of the apical layer was severely compromised with many  
243 regions entirely absent, indicating exhaustive infection in the culture and cytopathic effects (**S5 Fig**).  
244 Together, these results indicate that in our experimental conditions, MUC1 is not required for initial  
245 attachment in HAE and moreover that its loss leads to enhanced viral replication and spread,  
246 particularly at early time points (**Fig 7A and 7B**).

## 248 Discussion

249 It has been demonstrated that MUC1 plays an important, pathogen-specific, and potentially  
250 multifaceted role during respiratory infection [6,13,19,28,32]. MUC1 is an abundant constituent of the  
251 PCL where its extracellular domain contributes to airway surface hydration and its cytoplasmic domain  
252 has been shown to influence a variety of cellular signaling pathways that modulate the immune  
253 response [20,43], cell survival [44,45], and cancer progression [46]. Additionally, MUC1 expression and  
254 phosphorylation state depend on external inflammatory stimuli [21,22]. Based on our previous work  
255 [30] and that of others [28,32], MUC1 has been shown to play an important role during the context of  
256 IAV infection. However, the nature of this role is poorly understood, and prior research was done in cell  
257 culture systems lacking a well-developed glycocalyx or in mice, where mucin orthologs exhibit  
258 incomplete homology with their human counterparts. Thus, we sought to explore MUC1-IAV interaction,

259 dynamics of expression, and overall impact on IAV infection in a physiologically-relevant *in vitro* model  
260 of human airway epithelium.

261 Our results support a direct interaction between IAV and endogenous MUC1 during infection in  
262 HAE, extending previous findings that demonstrated colocalization of IAV with MUC1 on the surface of  
263 A549 cells [28]. Notably, MUC1-ED, the large extracellular domain of MUC1, is capable of dissociating  
264 from MUC1-CT through the autocatalytic SEA-module in response to external stimuli [47,48] and it has  
265 been previously suggested that this cleavage domain facilitates release of MUC1-ED upon interaction  
266 with IAV in the airway lumen [28]. However, we observed a decrease in soluble MUC1-ED after IAV  
267 infection in both HAE (**Fig 2**) and A549 cells (**S2 Fig**), suggesting that IAV binding to MUC1-ED does  
268 not induce its shedding to a significant degree in systems with endogenous expression with or without  
269 a dense glycocalyx. Indeed, we observed an increase in cell-associated MUC1 protein expression in  
270 infected cultures (**Fig 3D**); thus, a global downregulation of MUC1 cannot account for the loss of soluble  
271 MUC1. As conditioned supernatant and culture washes were collected hours after infection in our  
272 shedding experiments, it is possible that IAV infection downregulates MUC1-containing vesicles or  
273 sheddase expression, resulting in reduced MUC1 release through an indirect mechanism. Alternatively,  
274 the near-saturating levels of IAV used in these experiments might reduce MUC1 levels at the cell  
275 surface through endocytosis during viral uptake, thereby sequestering it from sheddase activity. As a  
276 decreased glycosylation state of MUC1 has been shown to increase its endocytosis [49], this potentially  
277 outlines a direct mechanism for IAV glycosidase in reduced surface-expressed MUC1 [50].

278 Surprisingly, we found that type I and type III IFN can upregulate MUC1 protein in HAE (**Fig 3D**)  
279 despite no significant changes in MUC1 mRNA levels (**Fig 3A-C**). These data suggest that MUC1  
280 expression is regulated through a post-transcriptional mechanism under these conditions. Notably,  
281 single cell RNA-Seq analysis of unstimulated HAE identified MUC1 transcripts in all component cell  
282 types (unpublished data), even basal cells where we observed MUC1 protein only after IFN stimulation  
283 in the present study, further corroborating this hypothesis. IAV upregulation of MUC1 protein in HAE

was not exclusively dependent on IFN signaling, indicating multiple soluble factors produced during infection may contribute to elevated MUC1 expression (**Fig 3D**). At least part of this increased expression was due to MUC1 upregulation at the apical surface (**Fig 4B** and **4C**) though broad expression of MUC1 across all HAE component cell types (**Fig 4A-C**) after IAV infection and IFN stimulation further indicates that MUC1 expression is nearly ubiquitous across the epithelium. While upregulation at the apical surface likely contributes to barrier function, expression here and in other cells types (e.g., basal cells) may serve alternative roles, potentially suppressing inflammation [43], and/or priming for epithelial repair in response to damage [7,46,51].

As macrophages play a key role during IAV infection [52] and previous work demonstrated that macrophages can express MUC1 in response to type II IFN [32], we explored whether IFN produced during IAV infection [33] could induce MUC1 in PMD macrophages. We show here that, in addition to HAE, PMD macrophages upregulate MUC1 following type I and type III IFN stimulation (**Fig 5A** and **5B**). Moreover, these PMD macrophages upregulate MUC1 in response to soluble factors produced by infected HAE (**Fig 5D**). These results suggest that sites of infected epithelium might induce MUC1 expression in local macrophages as well as potentially other immune effector cells that have been shown to at least conditionally express MUC1 [35–37]. Interestingly, the banding pattern of MUC1-ED as expressed in PMD macrophages (**Fig 5** and **S4 Fig**) suggests a markedly decreased glycosylation state compared to MUC1-ED expressed by HAE (results not shown). As the expression [32] and glycosylation state [49] of MUC1 can both independently influence uptake of foreign material in different cellular contexts, further investigation should be undertaken to explore cell-specific impacts of MUC1 expression during IAV infection.

We have also established a MUC1-depleted HAE system through CRISPR/Cas9 technology (**Fig 5**). Others have established similar workflows [53,54] which offer the powerful ability to genetically manipulate otherwise intractable primary human tissue. Our characterization of these immortalized KO cultures reveals robust protein depletion as well as no gross morphological pathology (**Fig 6C** and **6D**).

309 Additional functional characterization, however, revealed that MUC1 depleted cultures displayed  
310 markedly lower MCC compared with non-targeting control cultures (**Fig 6E**). As the PCL contributes to  
311 airway hydration and therefore proper secreted mucus mobility [1–3], it follows that MUC1 depletion  
312 could negatively affect this capability. It is also possible that loss of MUC1 alters other factors which  
313 impact MCC, such as baseline secreted mucin expression, which were not measured in this study.  
314 Future studies on air surface liquid characteristics such as PCL density and/or height, combined with  
315 other mucus steady state kinetics (e.g., secreted mucin expression) will better delineate the contribution  
316 MUC1 and other tethered mucins make toward overall mucociliary function. The HAE system we  
317 utilized here is one of several *in vitro* models that offer the ability to probe the mucosal interface which  
318 has been difficult to study in normal 2D tissue culture systems [55].

319 In our HAE system depleted for MUC1, we found that IAV growth kinetics are increased over  
320 control cultures, particularly at 12 and 24 hpi (**Fig 7A** and **7B**). By the earliest time point of 12 hpi,  
321 MUC1 depleted cultures had detectable titer whereas half of control cultures were below the limit of  
322 detection (**Fig 7B**). Additionally, not only was the number of foci detectable by *en face*  
323 immunofluorescence significantly higher, but there was also clear evidence of multicycle replication  
324 visible as early as 12 hpi (the earliest time point investigated) in MUC1 KO cultures compared to control  
325 cultures (**Fig 7A** and **7C**). Since IAV can produce new virions as early as 6 hours [56], this implies that  
326 there is a significant delay in both the timing and success rate of productive infection initiation in control  
327 cultures relative to MUC1 depleted cultures. Consistent with other findings [28], we found that IAV can  
328 interact with MUC1, although its absence does not seem to preclude productive IAV uptake. Indeed,  
329 as loss of MUC1 enhances viral replication, it is possible that MUC1 may not only be dispensable for  
330 initial attachment but in fact may counteract subsequent productive virion adsorption and possibly  
331 endocytic entry as well.

332 One current model for IAV uptake suggests that virions rely on multivalent interactions with  
333 sialylated host proteins and glycolipids to deform local membrane orientation and subsequently trigger

334 endosomal uptake [57,58]. While neuraminidase is normally thought of as a mechanism to avoid virion  
335 aggregation and inhibition by secreted mucins [50], recent work has additionally highlighted its  
336 importance at this early entry step at or near the host cell membrane [59,60]. In this model, tethered  
337 mucins support virion clearance through air-surface liquid hydration and MCC [1,2], but additionally as  
338 large constituents of the PCL, also sterically block and, when sialylated, compete with productive virion  
339 attachment to membrane-adjacent sialylated attachment sites [1,2]. In fact, work on artificial tethered  
340 mucin analogs has shown that both sialylated and unsialylated artificial tethered mucins can antagonize  
341 productive interactions with gangliosides and delay IAV fusion events, respectively [61].

342 Our results are consistent with the emerging role of MUC1 in response to inflammatory stimuli  
343 and we expand on known inflammatory triggers for its expression both in HAE and in PMD  
344 macrophages. Indeed, the surprising finding that MUC1 is upregulated beyond the apical layer supports  
345 a broader dynamic role during infection at the epithelial surface. Specifically, our data support the model  
346 proposed by Kato *et al.* [43] whereby pathogenic insult leads to general inflammation that subsequently  
347 upregulates MUC1 expression. This would immediately protect local epithelial cells by acting as a  
348 barrier, but further accumulation would help resolve potentially harmful inflammation and  
349 simultaneously prime cells for survival and ultimately proliferation to repair local tissue damage  
350 following infection.

351 Additionally, our results demonstrate that MUC1 significantly reduces IAV replication by acting  
352 early in infection, consistent with its canonical role as a barrier protecting the airway epithelium.  
353 However, instead of the model that suggests MUC1 is acting as a soluble decoy receptor that is  
354 dynamically shed in response to viral interaction, our work indicates that MUC1 acts as a general barrier  
355 to productive endocytic uptake. As we only investigate the earliest steps in IAV infection of HAE, future  
356 studies should aim to investigate how viral-mediated upregulation of MUC1 might impact subsequent  
357 spread and immune response to an established infection.

## 359 **Materials and Methods**

### 360 *Human airway epithelial cultures*

361 Human airway tracheobronchial epithelial cells isolated from airway specimens from donors  
362 without underlying lung disease were provided by Lonza, Inc. Primary cells derived from single patient  
363 sources were expanded on plastic and subsequently plated ( $5 \times 10^4$  cells / well) on rat-tail collagen type  
364 1-coated permeable transwell membrane supports (6.5 mm, #3470; Corning, Inc.). HAE cultures were  
365 first expanded in Pneumacult-Ex or Pneumacult-Ex Plus medium (#05008, #05040; StemCell  
366 Technologies), and differentiated in Pneumacult-ALI medium (#05001; StemCell Technologies) or  
367 custom ALI media (Spirovention, UNC Marsico Lung Institute) with provision of an air-liquid interface for  
368 approximately 6 weeks to form polarized cultures that resemble *in vivo* pseudostratified mucociliary  
369 epithelium. All cell cultures were maintained at 37°C with 5% CO<sub>2</sub>.

### 371 *Primary human macrophage cultures*

372 Peripheral blood was collected from healthy volunteers, and mononuclear cells were separated  
373 by Ficoll-Hypaque density gradient centrifugation. Monocytes were isolated by adherence to plastic  
374 and then cultured for one week in X-VIVO 15 serum-free medium (Lonza, Inc.) containing 1% penicillin-  
375 streptomycin, 1% L-glutamine (Gibco), and 20 ng / mL recombinant human GM-CSF or 30 ng / ml  
376 recombinant human M-CSF (300-03 and AF-300-25, respectively; Peprotech). Media containing growth  
377 factors was replenished 4 days after initial culture. Prior to stimulation, growth factor-containing media  
378 was removed and replaced with X-VIVO 15 media supplemented with 5% fetal bovine serum (Atlanta  
379 Biologicals). For HAE media stimulations, ALI media was added to standard stimulation media  
380 (comprising additional 25% volume) at 24 and 48 hours prior to lysate collection. All studies on human  
381 monocyte-derived macrophages were approved by the University of Maryland Institutional Review  
382 Board.



384 *MUC1 immunoprecipitation*

385 MUC1 antibodies (B27.29 and 115D8, gifts from Fujirebio Diagnostics Inc.) were conjugated to  
386 aldehyde / sulfate latex beads (Invitrogen). Following incubation with anti-MUC1 antibody, beads were  
387 incubated with 1 M glycine and 0.5% BSA to coat any remaining exposed area and prevent non-specific  
388 binding of protein during immunoprecipitation. HAE apical secretions were pre-treated with 0.1% triton-  
389 X before mixing with anti-MUC1-conjugated beads. Following overnight incubation at 4°C, the beads  
390 were washed twice with PBS and resuspended in 6 M urea and SDS-PAGE containing reducing agent.  
391 HAE secretions (not mixed with beads) were also resuspended in urea / SDS-PAGE buffer as a control.  
392 Samples were then vortexed, boiled, and loaded into a 1% agarose gel for electrophoresis and  
393 subsequent transfer to nitrocellulose membranes. Membranes were blocked with 5% milk / Tris-  
394 buffered saline and 0.1% (v/v) Tween 20 (TBS-T) before incubating with primary antibodies (anti-MUC1  
395 (B2729; 1:2000), recombinant H3-Fc (a gift from Dr. Wendy Barclay; 1:1000), and anti-MUC16 (OC126,  
396 Cell Marque; 1:2000)). Recombinant hemagglutinin proteins were generated by infection of insect cells  
397 with a recombinant baculovirus expressing the protein as previously described [62]. Membranes  
398 overlaid with rH3-Fc were subsequently probed with biotin-SP-conjugated AffiniPure goat anti-human  
399 IgG (Jackson ImmunoResearch; 1:2000). Immunodetection was performed using infrared dye-labeled  
400 secondary antibodies (IRDye 800CW Biosciences; each at 1:10,000) and visualized using a Li-Cor  
401 Odyssey Infrared Imaging System according to the manufacturer's protocol.

402

403 *ELISA*

404 Soluble MUC1 was quantified by ELISA (EHMUC1, Invitrogen) according to the manufacturer's  
405 protocol. To collect HAE samples prior to analysis, 50 µL phosphate-buffered saline (PBS) was applied  
406 to the apical chamber and incubated for 30 minutes at 37°C. Prior to experimentation in A549  
407 adenocarcinoma human alveolar basal epithelial cells, growth media (high-glucose DMEM (11-965-  
408 092, Gibco) supplemented with 10% fetal bovine serum (Genclone) was replaced with serum-free

DMEM. HAE culture washes and A549 culture supernatants were stored at -80°C prior to analysis. Total soluble MUC1 was calculated based on concentration determined by ELISA and total volume collected.

### *Influenza virus*

The reverse genetics systems for A/Puerto Rico/8/1934 (H1N1; PR8) and A/Udorn/307/72 (H3N2; Udorn), were generous gifts from Drs. Adolfo Garcia-Sastre and Robert Lamb, respectively. Infectious virus stocks were produced by plasmid transfection in 293T cells and subsequent co-culture with MDCK cells [63] and resultant virus amplified by passage in MDCK cells (MOI of 0.01) in the presence of 1.5 µg / mL TPCK trypsin. Virus from clarified supernatant was concentrated and purified through 20% sucrose on a 50% sucrose cushion and final viral titer was determined by standard plaque assay on MDCK cells. Briefly, confluent monolayers of MDCK cells in 12 well plates were washed twice with PBS prior to addition of 100 µL of viral inoculum diluted in serum free DMEM. This was incubated with periodic agitation for one hour at 37°C before being aspirated and replaced with 0.8% molten agar in DMEM/F-12 (Gibco) and 1.5 µg / mL TPCK trypsin. After agar solidification, plates were incubated at 37°C for 72 hours prior to counting.

For infection in unmodified HAE, cultures were washed with PBS for 15 minutes at 37°C to remove apical secretions and supplied with fresh basolateral medium prior to inoculation with sucrose-purified virus diluted in PBS to a final volume of 50 µL. Inoculum was applied to the apical surface of HAE for 2 hours at 37°C. Following incubation, viral inocula were removed, and cultures were washed with PBS for 10 minutes to remove unbound virus. To better mimic natural infection for time course infections in CRISPR/Cas9-modified, BCi-NS1.1-derived HAE, cultures were washed with PBS for 30 minutes at 37°C then incubated for 7 days to allow recovery of the secreted mucus layer prior to inoculation. In these experiments, sucrose-purified Udorn was diluted to 500 PFU in 10 µL PBS and inocula were not removed. For all experiments, progeny virus was harvested at indicated times by

434 performing apical washes with 50  $\mu$ L of PBS for 30 min at 37°C and stored at -80°C prior to analysis. To  
435 measure cytotoxicity, LDH in apical washes was measured with CytoTox 96 (G1780; Promega)  
436 according to manufacturer's instructions.

#### 437 *qRT-PCR*

438 RNA was extracted using RNeasy Mini Kit (Qiagen) according to the manufacturer's instructions.  
439 cDNA was prepared separately with SuperScript III (Invitrogen) per manufacturer's random hexamer  
440 protocol. For qPCR, reactions were carried out using LightCycler 480 SYBR Green I mastermix (Roche)  
441 and a LightCycler 480 Instrument II (Roche) at the manufacturer recommended settings. Primer  
442 sequences, if available, are listed below:  
443

| Gene Target              | Forward (5'-3')                  | Reverse (5'-3')                  |
|--------------------------|----------------------------------|----------------------------------|
| MUC1                     | Qiagen, proprietary (QT00015379) | Qiagen, proprietary (QT00015379) |
| HPRT1                    | Qiagen, proprietary (QT00059066) | Qiagen, proprietary (QT00059066) |
| MX1 (ENSG00000157601)    | GTTTCCGAAGTGGACATCGCA            | CTGCACAGGTTGTTCTCAGC             |
| CXCL10 (ENSG00000169245) | AGGAACCTCCAGTCTCAGCA             | ATTTTGCTCCCCTCTGGTTT             |

#### 445 *Western blot*

446 Protein lysate was collected with RIPA buffer (VWR Life Science) supplemented with 2X  
447 protease inhibitors (Pierce, Thermo Scientific). Protein concentration was quantified by BCA assay  
448 (Pierce, Thermo Scientific), loaded equivalently in each lane (ranging from 4-20  $\mu$ g between  
449 experiments) and run on a 4-20% Tris-Glycine gel (Novex, Invitrogen) under reducing conditions.  
450 Protein was transferred to a PVDF membrane (GE Healthcare) and blocked with 5% (w/v) fat free milk  
451 protein in TBS-T at room temperature. Unconjugated primary antibody incubations were done in the  
452 presence of blocking protein and TBS-T overnight at 4°C. Antibody details are as follows: MUC1-CT

(CT2, Invitrogen, 1:5,000); MUC1-ED (B27.29, a gift from Fujirebio Diagnostics Inc., 2.04 µg / mL); MUC4 (1G8, Santa Cruz, 1:5,000); and MX1 (N2C2, GeneTex, 1:5,000). After washing in TBS-T, membranes were probed with secondary antibodies for one hour at room temperature in blocking buffer. Specifically, anti-mouse IgGk-HRP (sc-516102, Santa Cruz, 1:10,000), anti-Armenian hamster IgG-HRP (PA1-32045, Invitrogen, 1:10,000), and anti-rabbit-HRP (32460, Invitrogen, 1:10,000) were used to image MUC1-ED and MUC4, MUC1-CT, and MX1, respectively. Actin was detected using a HRP-conjugated primary antibody (AC-15, A3854, Sigma-Aldrich, 1:35,000) for one hour at room temperature in blocking buffer with rocking. Imaging was performed with chemiluminescent SuperSignal Dura or Femto reagent (Thermo Scientific) on an iBright 1500 (Thermo Fisher).

#### *Cell culture treatments*

Unless specified elsewhere, recombinant human IFNβ (1 nM, 11415-1, PBL Assay Science), IFNλ3 (10 nM, 11730-1, PBL Assay Science), Ruxolitinib (2 µM, S1378, SelleckChem), and DMSO (ATCC) were applied to cell culture media or to both the apical and basolateral chamber of HAE cultures. TNFα (20 ng / mL, 210-TA, R&D Systems) was applied apically to HAE cultures. For experiments with primary macrophage cultures, IFNβ (1 nM), IFNλ3 (10 nM), TNFα (20 ng / mL), low molecular weight Poly(I:C) (10 µg / mL, k-picw, InvivoGen), and LPS (100 ng / mL *E. coli* K12, k-eklps, Invivogen) with IFNγ (20 ng / mL, R&D Systems) were supplemented into X-VIVO 15 media and 5% fetal bovine serum at indicated time points prior to lysis.

#### *Histology, immunohistochemistry (IHC), and immunofluorescence (IF) microscopy*

HAE cultures were fixed in 4% paraformaldehyde overnight prior to paraffin embedding and sectioning at either the Marsico Lung Institute Histology Core (Chapel Hill, NC) or the New York University Experimental Pathology Research Laboratory (New York, NY). Five micron-thick sections on slides were deparaffinized with xylene and rehydrated through gradient ethanol washes into distilled

water. For heat antigen retrieval, citrate buffer (2.94 g / L), pH 6.0, with 0.05% Tween-20 was heated to 98°C to boil deparaffinized slides for 15 minutes. After cooling the slides and washing in water, slides were blocked with 3% BSA in PBS supplemented with 1 mM CaCl<sub>2</sub> and 1 mM MgCl<sub>2</sub> (PBS++). Primary antibodies were diluted in 1% bovine serum albumin / PBS++ and incubated with the sample overnight at room temperature. Slides were then washed with PBS++ and secondary antibodies (also diluted in 1% bovine serum albumin / PBS++) added for one hour at room temperature. Slides were then stained with 4',6-Diamidino-2-Phenylindole, Dihydrochloride (DAPI, Invitrogen) or Hoechst 33342 Solution (Thermo Scientific), washed a final time with PBS++, and coverslips mounted with Vectashield antifade mounting solution (H-1000, Vector Laboratories). Antibodies for IHC and IF were as follows: acetylated alpha tubulin (cilia marker, clone 6-11B-1, ab24610, Abcam, 1:2000); MUC1-CT (clone MH1, CT2, MA5-11202, 1:150); anti-Armenian hamster IgG AlexaFluor-647 (ab173004, Abcam, 1:500); MUC16 (clone X325, ab10033, Abcam, 1:1000); MUC4 (clone 1G8, sc-33654, Santa Cruz, 1:100); influenza virus NP (clones A1 and A3, MAB8251, Sigma-Aldrich, 1:100); and anti-mouse IgG AlexaFluor-488 (Invitrogen, 1:500). For *en face* IF, antibodies were as follows: acetylated alpha tubulin (clone 6-11B-1, ab24610, Abcam, 1:2000) and anti-mouse IgG2b (clone 7E10G10, ab170192, Abcam, 1:500); MUC1-CT (clone MH1, CT2, MA5-11202, 1:50) and anti-Armenian hamster IgG AlexaFluor-647 (ab173004, Abcam, 1:500); influenza virus NP (clones A1 and A3, MAB8251, Sigma-Aldrich, 1:100) and anti-mouse IgG AlexaFluor-488 (Invitrogen, 1:500).

For transmission electron microscopy detection of virus and MUC1, two protocols were used. In the first, HAE cultures were washed and 4.7E6 PFU sucrose-purified A/Udorn/307/72 was allowed to adsorb for one hour at 37°C followed by transfer of the cultures to 4°C for all subsequent steps up to fixation (**Fig 1D**). In the second, HAE cultures were washed and 5E5 PFU dialyzed, sucrose-purified A/Udorn/307/72 was allowed to adsorb for 2 hours at 4°C (**Fig 1B, 1C, and 1E**). Virus inoculum was removed and cultures were blocked with 10% (v/v) normal donkey serum for one hour. Anti-MUC1-ED B27.29 (2.04 ug / mL) and anti-Hong Kong/68 goat antiserum (NR-3118, BEI Resources) was added

504 in the presence of blocking serum overnight. Cultures were washed with PBS++ to remove primary  
505 antibodies before addition of 18 nm-gold conjugated anti-mouse (1:10, Jackson ImmunoResearch  
506 Laboratories, Inc.) and 6 nm-gold conjugated anti-goat (1:20, Jackson ImmunoResearch Laboratories,  
507 Inc.) in blocking solution for one hour. Secondary antibodies were removed, cultures washed and  
508 subsequently fixed in 2% glutaraldehyde in 0.1M cacodylate buffer for one hour at room temperature.  
509 Following a further washing step in 0.1 M cacodylate buffer, a secondary fixation step using 1% OsO<sub>4</sub>  
510 and 1% K<sub>3</sub>Fe(CN)<sub>6</sub> in 0.1M cacodylate buffer was performed for one hour. A final wash of 0.1M  
511 cacodylate buffer was performed before post-fixation treatment with 2% uranyl acetate solution in  
512 dsH<sub>2</sub>O for one hour. Cultures were then dehydrated in increasing concentrations of ethanol. Finally,  
513 cultures were infiltrated with 100% propylene oxide and subsequently increasing ratios of Spurr's Resin  
514 up to the final embedding step of 100% Spurr's Resin. Cultures were then imaged at 80kV on the  
515 Hitachi HT7700 Transmission Electron Microscope at the Laboratory for Biological Ultrastructure at the  
516 University of Maryland.

### 518 *Mucociliary clearance*

519 HAE mucus was allowed to accumulate for one week prior to the application of 5 µl of 2 µm red-  
520 fluorescent (Cy3) polystyrene microspheres (1:50 dilution, Sigma-Aldrich) to the apical chamber of the  
521 transwell. Cultures were allowed to equilibrate for 24 hours after which the HAE cultures were imaged.  
522 For each culture, videos of three regions were recorded at 10 X magnification. Images were collected  
523 at a frame rate of 0.5 Hz for 60 seconds on the plane of the mucus gel. Since the secreted mucus tends  
524 to accumulate at the edges of the transwells, images were taken centrally to avoid areas of thick mucus.  
525 The microsphere tracking data analysis is based on an image processing algorithm that was custom  
526 written in MATLAB [64]. Briefly, the analysis software computes the xy-plane trajectories of each  
527 fluorescent microsphere in each frame. Using the first and last position obtained from trajectory data,  
528 displacement of microspheres was computed, and transport rate was calculated by dividing the

529 displacement by total time elapsed. Microspheres with transport rates of less than 0.01  $\mu\text{m} / \text{s}$  (less  
530 than 0.01% of microspheres) were considered immobile and removed from the data set.

### 531 532 *CRISPR/Cas9-mediated knockout of specific mucin glycoproteins in HAE*

533 To select regions for CRISPR/Cas9-mediated knockout, MUC1 (ENSG00000185499) was  
534 analyzed using Ensembl [25]. Guide RNA sites were selected based on favorable targeting, Doench,  
535 and Xu scores. Putative guides were ordered from IDT with flanking restriction sites for cloning into the  
536 plentiCRISPRv2 backbone [65] with eGFP replacing puromycin selection. The final guide targets region  
537 155,187,791 – 155,187,813 on chromosome 1 with WTSI Genome Editing ID of 915343298. Lentiviral  
538 stocks were generated by co-transfection of 1  $\mu\text{g}$  plentiCRISPRv2 (a gift from Dr. Feng Zhang  
539 (Addgene plasmid #52961; <http://n2t.net/addgene:52961>; RRID:Addgene\_52961)), 0.2  $\mu\text{g}$  pCMV-VSV-  
540 G (a gift from Dr. Bob Weinberg (Addgene plasmid #8454; <http://n2t.net/addgene:8454>;  
541 RRID:Addgene\_8454)) [66], and 0.7  $\mu\text{g}$  psPAX2 (a gift from Dr. Didier Trono (Addgene plasmid  
542 #12260; <http://n2t.net/addgene:12260>; RRID:Addgene\_12260)) into HEK293T cells with X-tremeGENE  
543 HP (Roche) in OptiMEM (Invitrogen) per manufacturer's protocol. Lentivirus-laden supernatant was  
544 collected and replaced at 24 hour intervals up to 72 hours, pooled, and filtered to remove viable cells  
545 and debris.

546 For target cell transduction, lentivirus-containing supernatant was applied to BCI-NS1.1 (kindly  
547 provided by Drs. Matthew Walters and Ronald Crystal; maintained as HAE above, [42]) at 40-60%  
548 confluence with a final concentration of 20 mM HEPES (Gibco) and 4  $\mu\text{g} / \text{mL}$  Polybrene (American  
549 Bio). Cells were then centrifuged (1,000  $g$  for one hour at 37°C) and incubated at 37°C overnight. The  
550 inoculum was removed and replaced with fresh growth media. At 60-80% confluence cells were  
551 passaged and expanded prior to being sorted for eGFP expression compared to untransduced control  
552 cells. Sorted transduced cells were frozen down for later use or subjected to EnGen mutation detection  
553 kit (New England BioLabs) for on-target gene editing confirmation. Upon thawing, transduced cells were

554 expanded once before transfer to collagen-coated membranes as with primary HAE. Target protein  
555 depletion in mature, differentiated cultures was confirmed by western blot. Select cultures were fixed in  
556 4% paraformaldehyde, then paraffin-embedded, sectioned, and stained with hematoxylin and eosin  
557 (H&E) at the New York University Experimental Pathology Research Laboratory, and subsequently  
558 imaged on a Nikon eclipse microscope at the University of Maryland Imaging Core.

### 559 *Software Used and Statistical Analysis*

561 ImageJ was used to quantify fluorescence intensity in IF experiments and band intensity of  
562 indicated western blot developments. Statistical analyses were performed using native GraphPad  
563 Prism 8 software.

### 564 **Acknowledgments**

565 We thank Drs. Adolfo Garcia-Sastre (Icahn School of Medicine at Mount Sinai), Robert Lamb  
566 (Northwestern University), Wendy Barclay (Imperial College London), and Matthew Walters and Ronald  
567 Crystal (Cornell University) for generously sharing reagents. We also thank the Addgene depositors  
568 Drs. Feng Zhang, Bob Weinberg, and Didier Trono for their contributions in making reagents broadly  
569 accessible. We are also grateful to the directors and teams of the University of Maryland Laboratory for  
570 Biological Ultrastructure, Imaging Core, and Genomics Core as well as the New York University  
571 Experimental Pathology Research Laboratory and the Marsico Lung Institute Histology Core.

572 The following reagent was obtained through BEI Resources, NIAID, NIH: Polyclonal Anti-  
573 Influenza Virus H3 Hemagglutinin (HA), A/Hong Kong/1/1968 (H3N2), (antiserum, Goat), NR-3118.

574 The authors declare that they have no competing interests.

### 575 **Funding**



578 This work was supported in part by the National Heart, Lung, and Blood Institute (R01 HL151840,  
579 to MAS) and the National Institute of Allergy and Infectious Diseases (R21 AI142050, to MAS and  
580 GAD). Additional funding was provided by the Burroughs Wellcome Fund Career Award at the Scientific  
581 Interface (to GAD) and the Cystic Fibrosis Foundation (DUNCAN18I0). MAS is a Parker B. Francis  
582 Fellow in Pulmonary Research and EBI was supported by NIH Institutional Training Grant T32  
583 AI125186A.

584 The funding agencies had no role in the design of the study and collection, analysis, and  
585 interpretation of data or in writing the manuscript.

### 587 **Authors' contributions**

588 MAS designed the project. EI and MAS wrote the manuscript and designed the experiments. EI,  
589 KG, DS, TBG, KH, MK, and MP performed the experimental work. Specifically: EI rescued, propagated,  
590 and concentrated virus stocks, generated transmission electron microscopy samples, generated MUC1  
591 depleted HAE cultures and controls, performed *en face* staining of HAE cultures, and analyzed PMD  
592 macrophage lysates by western blot; KG performed and analyzed experiments related to MUC1  
593 expression in HAE cultures; DS performed MCC microscopy and analysis; TBG processed and  
594 analyzed transmission electron microscopy samples; KH isolated, differentiated, and stimulated the  
595 PMD macrophages; MK performed the MUC1 immunoprecipitation from HAE apical secretions and  
596 overlay experiments; SS developed a tool for control guide RNA design; MP and EI performed MUC1  
597 quantitation experiments; GAD and MK contributed reagents and expertise. All authors read and  
598 approved the final manuscript.

### 600 **Figures and captions**

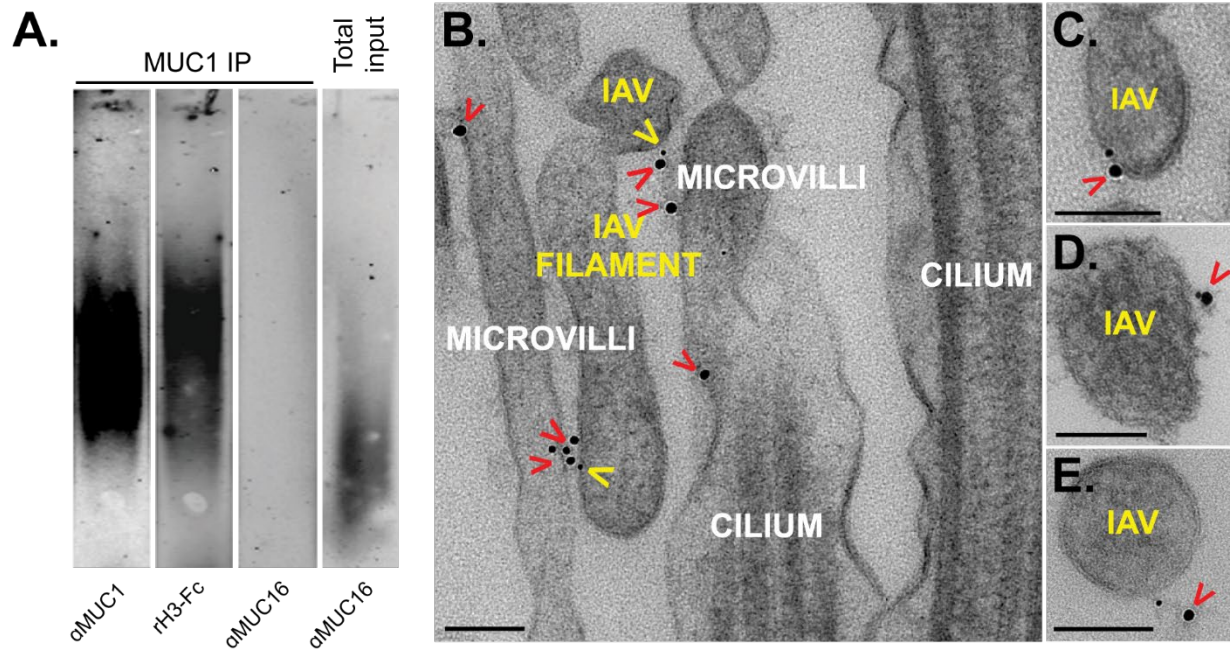

602  
603 **Fig 1. IAV hemagglutinin protein binds HAE-derived MUC1 and co-localizes with MUC1 during**  
604 **infection.**

605 (A) Immunoprecipitation of MUC1 (lanes 1-3) from HAE apical secretions (lane 4). Lane 1 was probed  
606 and blotted for MUC1-ED. Lane 2 was probed with a recombinant, Fc-tagged IAV H3 hemagglutinin  
607 probe and blotted for Fc. Lane 3 and 4 were probed and blotted for MUC16. (B-E) Transmission electron  
608 microscopy of HAE after adsorption with A/Udorn/307/72(H3N2) influenza virus. MUC1 (indicated by  
609 red carets) and H3 (yellow carets) were detected with 18nm and 6nm gold nanoparticle-conjugated  
610 antibodies, respectively. Scale bars = 100 nm.

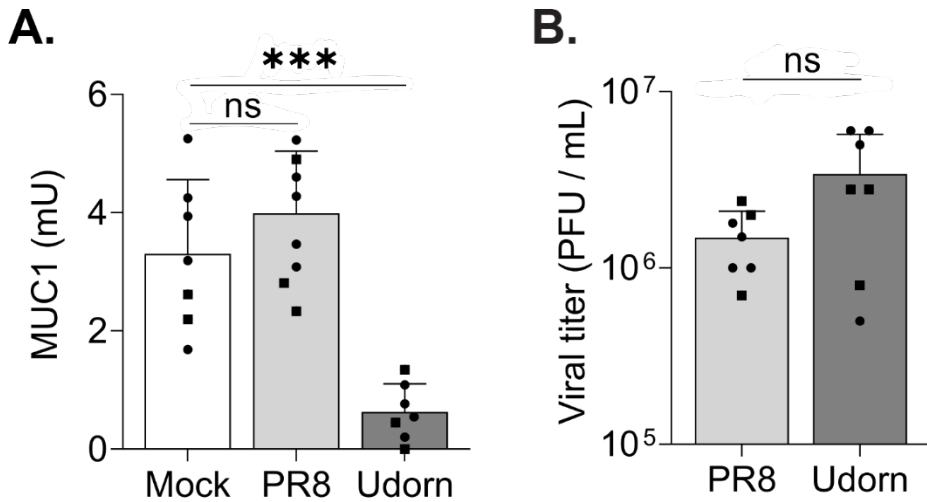

**Fig 2. IAV replication in HAE is associated with a reduction in soluble MUC1.**

HAE cultures were infected with 5E4 PFU of either A/PR/8/34 or A/Udorn/307/72 or mock-infected. After 24 hours, apical HAE compartments were washed with PBS which was used to determine (A) soluble MUC1-ED by ELISA and (B) viral titer by plaque assay. Results shown are from two independent experiments, indicated by circles and squares. Experimental results were analyzed by Mann-Whitney U test compared to mock conditions (A) or each other (B) and significant where indicated (\*\*\*)  $p < 0.0002$ ; ns = not significant).

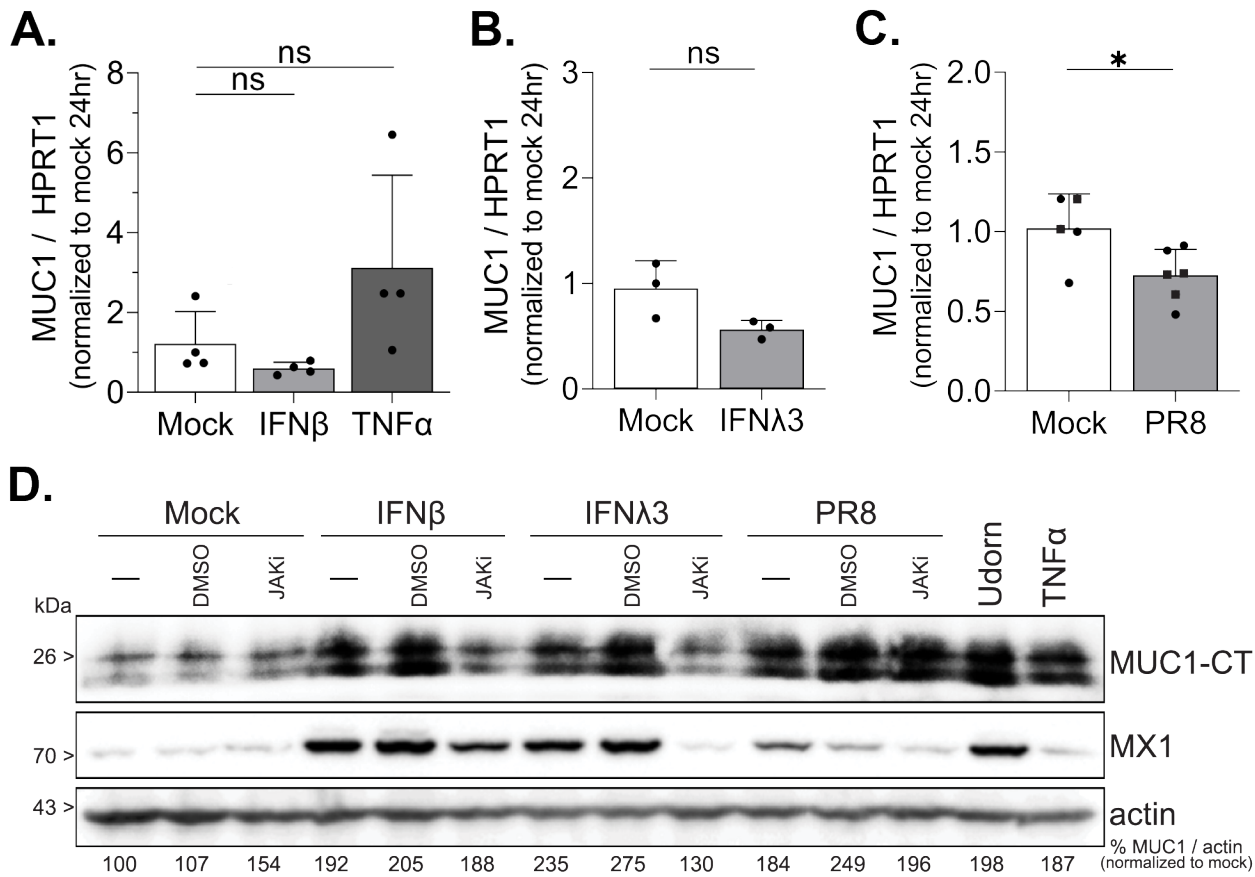

**Fig 3. Membrane-tethered MUC1 levels are upregulated during IAV infection and interferon treatment.**

HAE were (A and B) stimulated as indicated or (C) infected with IAV and MUC1 expression quantified by qPCR after 24 hours of treatment. In (D) HAE were stimulated as indicated with IFN or IAV as before (-), in the presence of JAK inhibitor Ruxolitinib (JAKi), or with DMSO as a vehicle control. After 24 hours, lysate was collected and analyzed by Western blot for MUC1 (cytoplasmic tail), MX1, or actin. Detection of MUC1-CT (vs. MUC1-ED) enables resolvable bands and facilitates quantification. Results reported in (C) are from two experimental replicates, denoted by circles and squares. All experimental results were analyzed by Mann-Whitney U test compared to mock conditions and significant where indicated (\*  $p < 0.0332$ ).

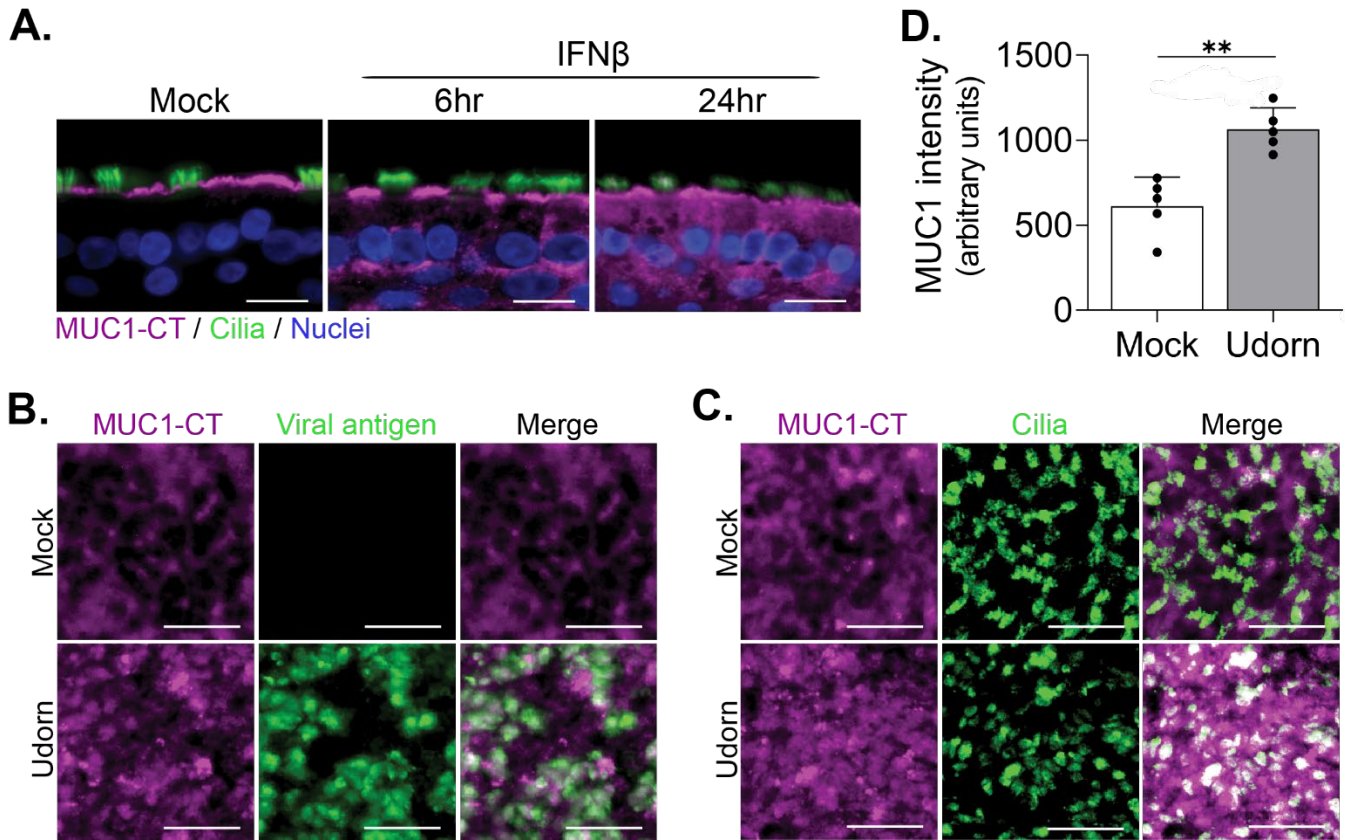

**Fig 4. IAV and type I IFN broadly upregulate MUC1 expression across HAE.**

(A) HAE were stimulated with IFN $\beta$  or mock conditions and at indicated time points fixed for immunohistochemical detection of MUC1-CT (purple), acetylated alpha-tubulin (cilia marker; green), and nuclei. HAE were infected with IAV (5E4 PFU) and stained *en face* for (A) MUC1-CT (purple), viral NP (green), and (C) acetylated alpha-tubulin (cilia marker; green). In (D), intensity of MUC1-CT staining quantified by ImageJ and analyzed by Mann-Whitney U test compared to mock condition, indicating significance (\*\* p < 0.0021). Scale bars are (A) 20  $\mu$ m and (B and C) 25  $\mu$ m.

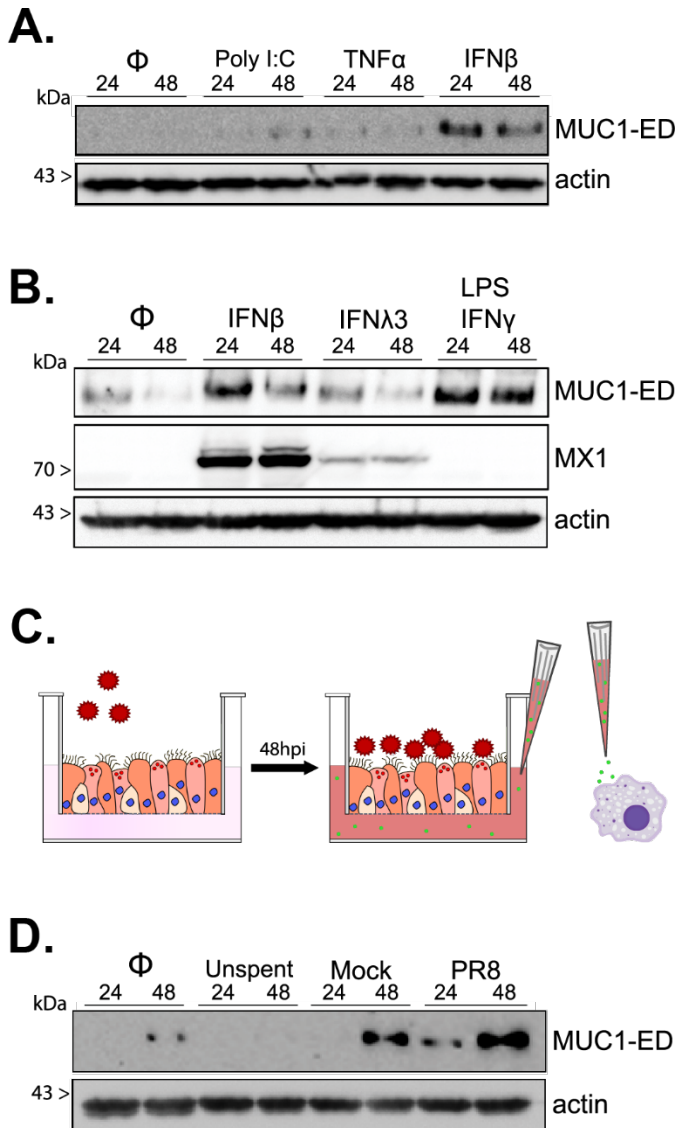

640  
641 **Fig 5. IAV infected HAE upregulate MUC1 on primary human monocyte-derived macrophages**  
642 **and HAE through soluble factors.**

643 GM-CSF-derived PMD macrophages were either untreated ( $\Phi$ ) or stimulated as indicated for 24 or 48  
644 hours. Cell lysates were then collected and analyzed by Western blot for (A) MUC1-ED and actin or (B)  
645 MUC1-ED, MX1, and actin. (C) Cartoon schematic of experiment conditions in (D) where PMD  
646 macrophages were stimulated with freshly prepared, mock-conditioned, or IAV-infected HAE-  
647 conditioned basolateral media before lysate collection and Western blot analysis, as above.

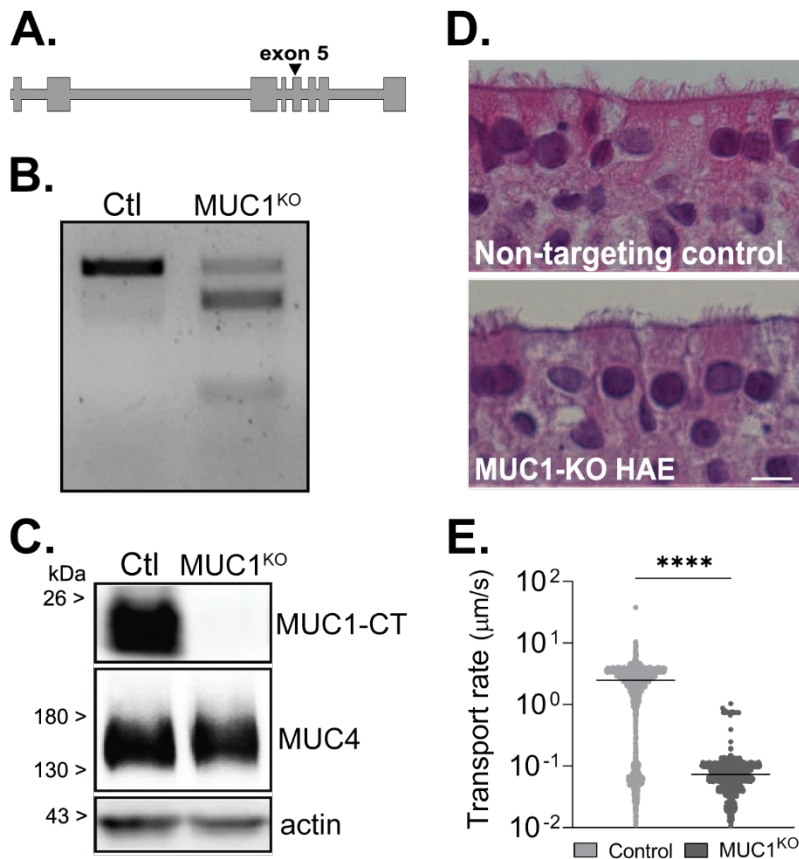

**Fig 6. Establishment and characterization of immortalized HAE depleted for MUC1.**

Previously immortalized human airway epithelial cells (BCi-NS1.1; [42]) were transduced with CRISPR/Cas9 and sgRNA (A) targeting MUC1 exon 5 for protein depletion (MUC1<sup>KO</sup>) or without predicted targeting site (Ctl / Control). (B) Genomic DNA was extracted and used in a T7 endonuclease I cleavage assay demonstrating editing at the target site. (C) After differentiation, total HAE lysate was collected, separated by PAGE, and blotted for MUC1-CT, non-targeted tethered mucin MUC4 (extracellular domain), and actin. (D) H&E stained, histological sections of paraffin embedded cultures show normal ciliated epithelium. Scale bar = 20 μm. (E) Fluorescent microparticles were applied apically to indicated cultures to determine mucociliary transport rate. MCC between culture types was analyzed by Mann-Whitney U test, indicating significance (\*\*\*\* p<0.0001).

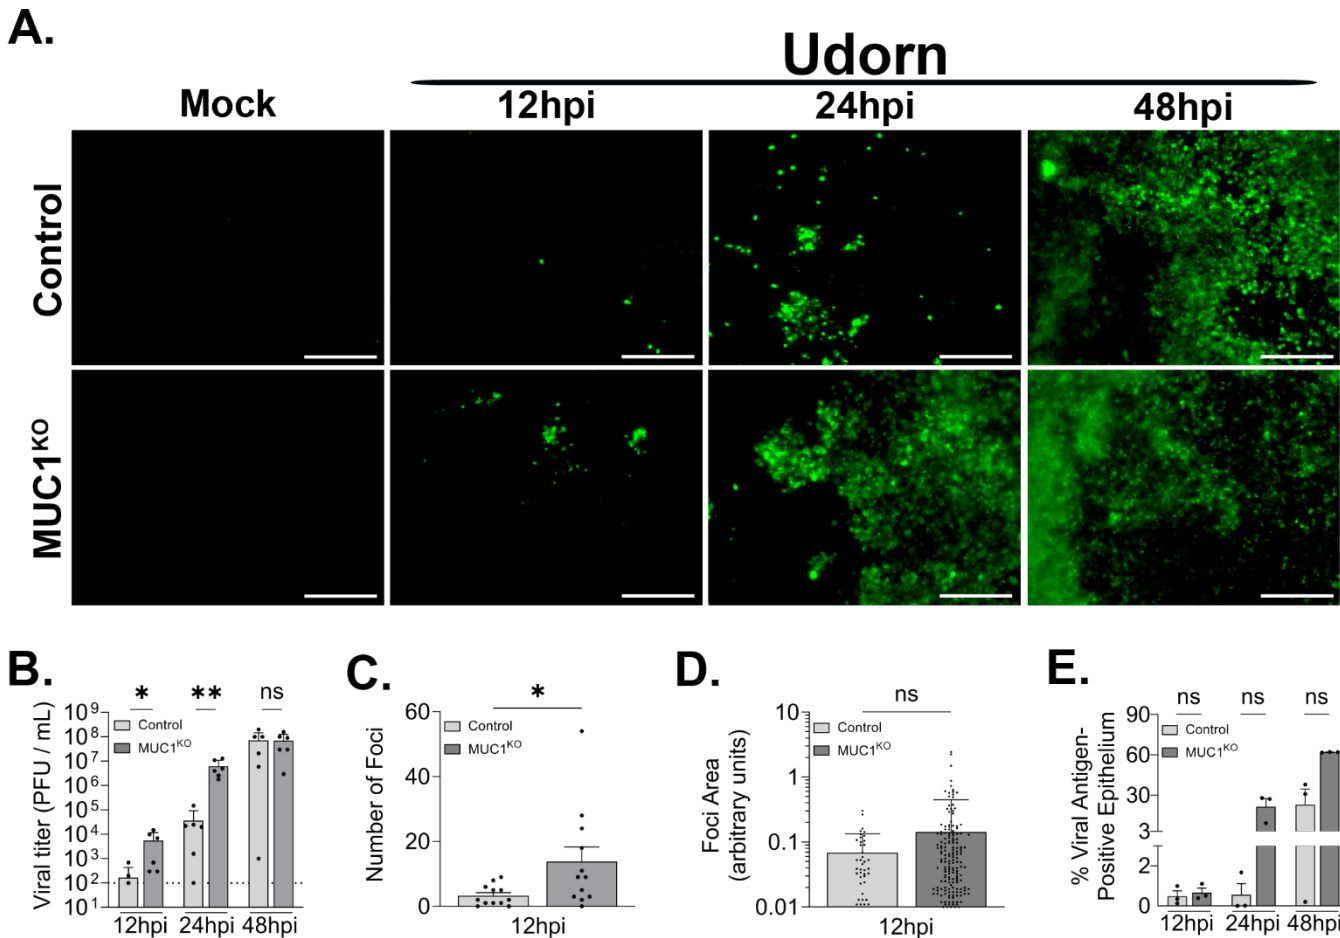

**Fig 7. IAV challenge in HAE lacking MUC1 reveals enhanced viral spread.**

Well-differentiated control or MUC1<sup>KO</sup> HAE cultures were infected with IAV (500 PFU). At the indicated time points, cultures were washed apically with PBS for viral titer determination, subsequently fixed, and (A) stained *en face* for viral NP antigen. Scale bars = 100  $\mu$ m. (B) Viral titer determined by plaque assay. Quantification of (C) plaque foci number, (D) plaque foci area of cultures with pre-determined fields of view, and (E) total infection area as determined by viral NP antigen stain. Results in (C-E) were processed in ImageJ and results analyzed by Mann-Whitney U test, significant where indicated (\*  $p < 0.0332$ , \*\*  $p < 0.0021$ ).

**Supporting information captions**



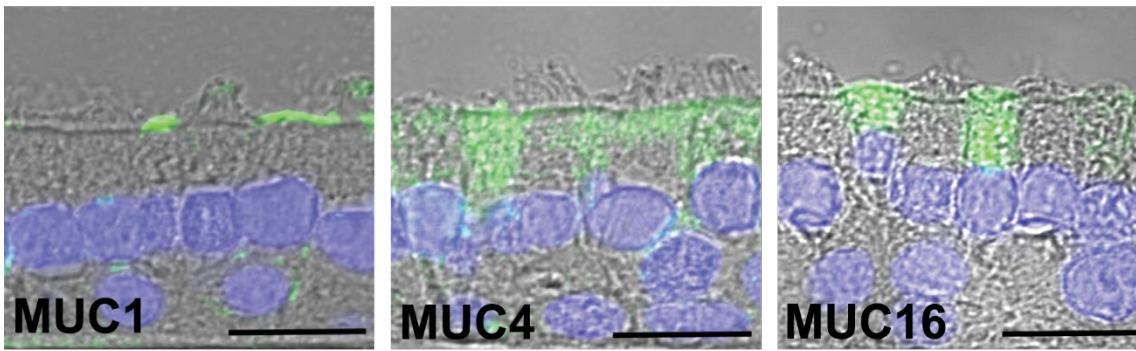

**S1 Fig. The HAE system recapitulates airway epithelial morphology and tethered mucin expression.** Immunohistochemistry of primary HAE cultures detecting the extracellular domains of tethered mucins MUC1, MUC4, and MUC16. MUC4 and MUC16 stains represent immature glycosylation forms while mature proteins localize to the extracellular apical lumen. Scale bar = 20  $\mu\text{m}$ .

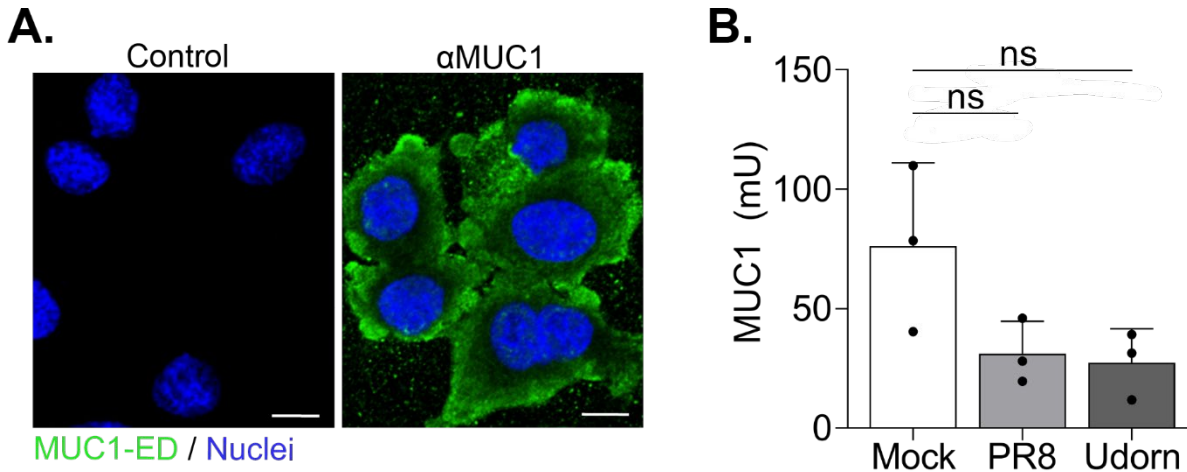

**S2 Fig. MUC1-expressing cells that lack a robust glycocalyx do not shed MUC1 after IAV infection.** (A) A549 cells were stained for the extracellular domain of MUC1 and nuclei. Scale bar = 50  $\mu\text{m}$ . In (B), A549 cells were infected with IAV as indicated and MUC1 in the cell culture supernatants 24 hours post-infection was quantified by ELISA. Results were analyzed by Mann-Whitney U test compared to mock condition (ns = not significant).

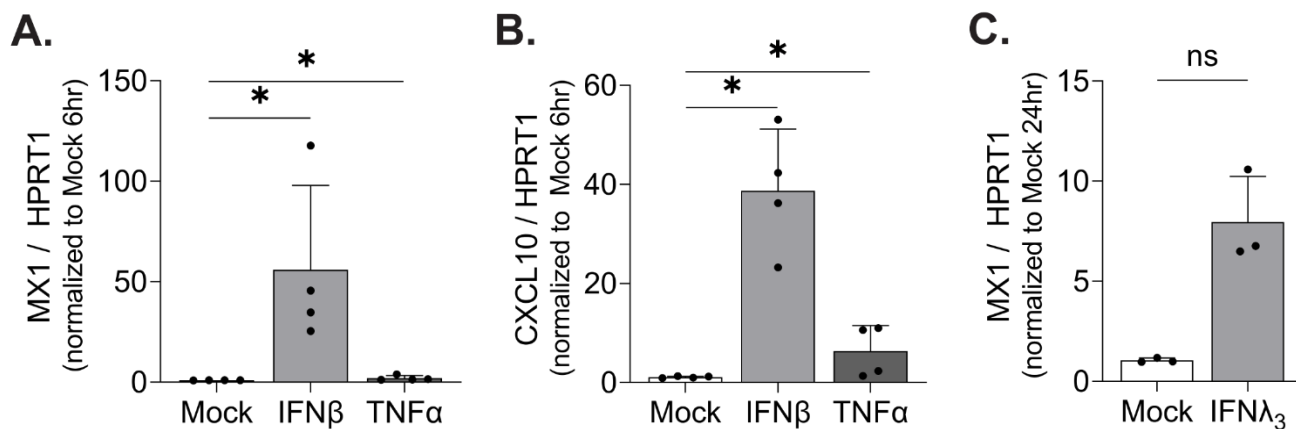

684

685

686

687

688

689

690

**S3 Fig. Expression of canonical interferon-stimulated genes and inflammatory chemokines in HAE following cytokine stimulation.** HAE were stimulated with recombinant human IFN $\beta$ , TNF $\alpha$ , or mock conditions 6 hours and then total RNA collected for qPCR quantification of (A) MX1 and (B) CXCL10. In (C) HAE were stimulated with recombinant IFN $\lambda_3$  for 24 hours prior to RNA collection and qPCR quantification of MX1 as before. Experimental results were analyzed by Mann-Whitney U test compared to mock conditions (\*p < 0.0332; ns = not significant).

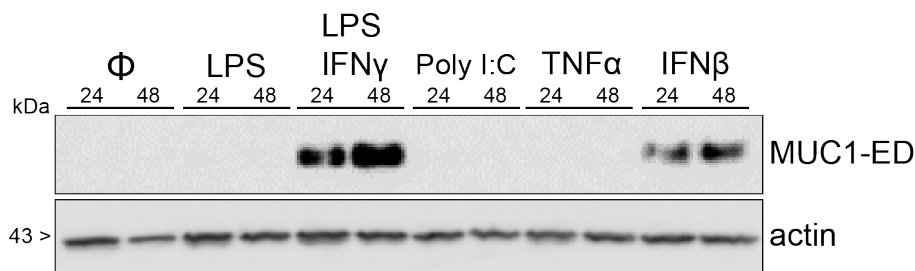

691

692

693

694

695

**S4 Fig. Primary monocyte-derived macrophages grown in M-CSF conditions upregulate MUC1 in response to type I interferon.** PMD macrophages grown in the presence of M-CSF were stimulated as indicated before lysate collection at 24 and 48 hours. MUC1-ED and actin expression were analyzed by Western blot.

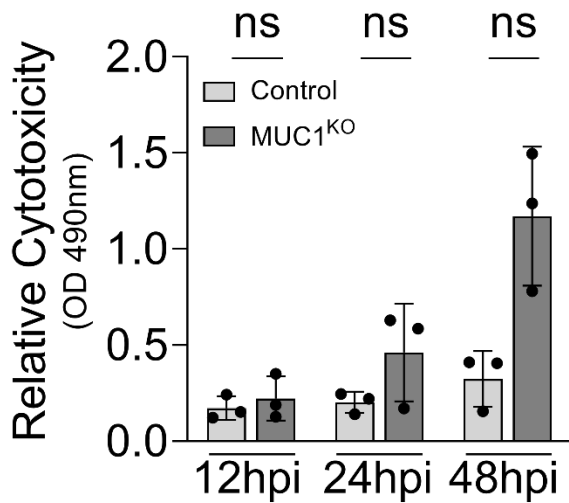

696

697

698

699

700

701

**S5 Fig. Relative cytotoxicity increases substantially at later time points during IAV infection in HAE.** Relative cytotoxicity in MUC1-depleted and control HAE following IAV infection determined by quantification of lactate dehydrogenase levels in apical washes at indicated time points. Experimental results were analyzed by Mann-Whitney U test compared to control cultures of the same time point (ns = not significant).

## 702 References

- 703 1. Button B, Cai L-H, Ehre C, Kesimer M, Hill DB, Sheehan JK, et al. A periciliary brush promotes the lung health by  
704 separating the mucus layer from airway epithelia. *Science*. 2012;337(6097):937–41.
- 705 2. Kesimer M, Ehre C, Burns KA, Davis CW, Sheehan JK, Pickles RJ. Molecular organization of the mucins and  
706 glycocalyx underlying mucus transport over mucosal surfaces of the airways. *Mucosal Immunology*. 2013  
707 Mar;6(2):379–92.
- 708 3. Hattrup CL, Gendler SJ. Structure and Function of the Cell Surface (Tethered) Mucins. *Annual Review of Physiology*.  
709 2008 Mar;70(1):431–57.
- 710 4. Bustamante-Marin XM, Ostrowski LE. Cilia and Mucociliary Clearance. *Cold Spring Harb Perspect Biol*. 2017 Apr  
711 3;9(4).
- 712 5. Ma J, Rubin BK, Voynow JA. Mucins, Mucus, and Goblet Cells. *Chest*. 2018 Jul;154(1):169–76.
- 713 6. Lu W, Hisatsune A, Koga T, Kato K, Kuwahara I, Lillehoj EP, et al. Cutting Edge: Enhanced Pulmonary Clearance of  
714 *Pseudomonas aeruginosa* by Muc1 Knockout Mice. *The Journal of Immunology*. 2006 Apr 1;176(7):3890–4.
- 715 7. Carson DD. The Cytoplasmic Tail of MUC1: A Very Busy Place. *Science Signaling*. 2008 Jul 8;1(27):pe35–pe35.
- 716 8. Kato K, Lillehoj EP, Park YS, Umehara T, Hoffman NE, Madesh M, et al. Membrane-Tethered MUC1 Mucin Is  
717 Phosphorylated by Epidermal Growth Factor Receptor in Airway Epithelial Cells and Associates with TLR5 To Inhibit  
718 Recruitment of MyD88. *The Journal of Immunology*. 2012 Feb 15;188(4):2014–22.
- 719 9. Singh PK, Wen Y, Swanson BJ, Shanmugam K, Kazlauskas A, Cerny RL, et al. Platelet-Derived Growth Factor  
720 Receptor  $\beta$ -Mediated Phosphorylation of MUC1 Enhances Invasiveness in Pancreatic Adenocarcinoma Cells.  
721 *Cancer Res*. 2007 Jun 1;67(11):5201–10.
- 722 10. Wei X, Xu H, Kufe D. MUC1 Oncoprotein Stabilizes and Activates Estrogen Receptor  $\alpha$ . *Molecular Cell*. 2006 Jan  
723 20;21(2):295–305.
- 724 11. Escher TE, Lui AJ, Geanes ES, Walter KR, Tawfik O, Hagan CR, et al. Interaction Between MUC1 and STAT1 Drives  
725 IFITM1 Overexpression in Aromatase Inhibitor-Resistant Breast Cancer Cells and Mediates Estrogen-Induced  
726 Apoptosis. *Mol Cancer Res*. 2019 May;17(5):1180–94.
- 727 12. Bitler BG, Goverdhan A, Schroeder JA. MUC1 regulates nuclear localization and function of the epidermal growth  
728 factor receptor. *J Cell Sci*. 2010 May 15;123(10):1716–23.
- 729 13. Dhar P, Ng GZ, Dunne EM, Sutton P. Mucin 1 protects against severe *Streptococcus pneumoniae* infection.  
730 *Virulence*. 2017 Jul 13;8(8):1631–42.
- 731 14. Nguyen Y, Procaro MC, Ashley SL, O’Neal WK, Pickles RJ, Weinberg JB. Limited effects of Muc1 deficiency on  
732 mouse adenovirus type 1 respiratory infection. *Virus Research*. 2011 Sep;160(1–2):351–9.
- 733 15. Arcasoy SM, Latoche J, Gondor M, Watkins SC, Henderson RA, Hughey R, et al. MUC1 and Other  
734 Sialoglycoconjugates Inhibit Adenovirus-mediated Gene Transfer to Epithelial Cells. *Am J Respir Cell Mol Biol*. 1997  
735 Oct 1;17(4):422–35.

- 736 16. Stonebraker JR, Wagner D, Lefenstey RW, Burns K, Gendler SJ, Bergelson JM, et al. Glycocalyx Restricts Adenoviral  
737 Vector Access to Apical Receptors Expressed on Respiratory Epithelium In Vitro and In Vivo: Role for Tethered  
738 Mucins as Barriers to Luminal Infection. *J Virol*. 2004 Dec;78(24):13755–68.
- 739 17. Costa N-R. Relevance of MUC1 mucin variable number of tandem repeats polymorphism in *H pylori* adhesion to  
740 gastric epithelial cells. *World Journal of Gastroenterology*. 2008;14(9):1411.
- 741 18. Saeland E, de Jong MAWP, Nabatov AA, Kalay H, Geijtenbeek TBH, van Kooyk Y. MUC1 in human milk blocks  
742 transmission of human immunodeficiency virus from dendritic cells to T cells. *Molecular Immunology*. 2009 Jul  
743 1;46(11):2309–16.
- 744 19. Li Y, Dinwiddie DL, Harrod KS, Jiang Y, Kim KC. Anti-inflammatory effect of MUC1 during respiratory syncytial virus  
745 infection of lung epithelial cells in vitro. *Am J Physiol Lung Cell Mol Physiol*. 2010 Apr;298(4):L558–63.
- 746 20. Dhar P, McAuley J. The Role of the Cell Surface Mucin MUC1 as a Barrier to Infection and Regulator of  
747 Inflammation. *Front Cell Infect Microbiol*. 2019 Apr 24;9:117.
- 748 21. Lagow EL, Carson DD. Synergistic stimulation of MUC1 expression in normal breast epithelia and breast cancer cells  
749 by interferon- $\gamma$  and tumor necrosis factor- $\alpha$ . *Journal of Cellular Biochemistry*. 2002;86(4):759–72.
- 750 22. Koga T, Kuwahara I, Lillehoj EP, Lu W, Miyata T, Isohama Y, et al. TNF- $\alpha$  induces MUC1 gene transcription in lung  
751 epithelial cells: its signaling pathway and biological implication. *American Journal of Physiology-Lung Cellular and  
752 Molecular Physiology*. 2007 Sep 1;293(3):L693–701.
- 753 23. Taubenberger JK, Morens DM. The Pathology of Influenza Virus Infections. *Annu Rev Pathol*. 2008;3:499–522.
- 754 24. Iuliano AD, Roguski KM, Chang HH, Muscatello DJ, Palekar R, Tempia S, et al. Estimates of global seasonal  
755 influenza-associated respiratory mortality: a modelling study. *The Lancet*. 2018 Mar 31;391(10127):1285–300.
- 756 25. Mayr J, Lau K, Lai JCC, Gagarinov IA, Shi Y, McAtamney S, et al. Unravelling the Role of O -glycans in Influenza A  
757 Virus Infection. *Scientific Reports*. 2018 Nov 6;8(1):1–12.
- 758 26. Lloren KKS, Lee T, Kwon JJ, Song M-S. Molecular Markers for Interspecies Transmission of Avian Influenza Viruses in  
759 Mammalian Hosts. *Int J Mol Sci*. 2017 Dec 13;18(12).
- 760 27. Lakadamyali M, Rust MJ, Zhuang X. Endocytosis of influenza viruses. *Microbes and Infection*. 2004 Aug;6(10):929–  
761 36.
- 762 28. McAuley JL, Corcilius L, Tan H-X, Payne RJ, McGuckin MA, Brown LE. The cell surface mucin MUC1 limits the  
763 severity of influenza A virus infection. *Mucosal Immunology*. 2017 Nov;10(6):1581–93.
- 764 29. Kesimer M, Kirkham S, Pickles RJ, Henderson AG, Alexis NE, DeMaria G, et al. Tracheobronchial air-liquid interface  
765 cell culture: a model for innate mucosal defense of the upper airways? *American Journal of Physiology-Lung  
766 Cellular and Molecular Physiology*. 2009 Jan 1;296(1):L92–100.
- 767 30. Kesimer M, Scull M, Brighton B, DeMaria G, Burns K, O'Neal W, et al. Characterization of exosome-like vesicles  
768 released from human tracheobronchial ciliated epithelium: a possible role in innate defense. *The FASEB Journal*.  
769 2009 Jun 1;23(6):1858–68.
- 770 31. Banerjee I, Yamauchi Y, Helenius A, Horvath P. High-Content Analysis of Sequential Events during the Early Phase  
771 of Influenza A Virus Infection. *PLOS ONE*. 2013 Jul 12;8(7):e68450.

- 772 32. Kato K, Uchino R, Lillehoj EP, Knox K, Lin Y, Kim KC. Membrane-Tethered MUC1 Mucin Counter-Regulates the  
773 Phagocytic Activity of Macrophages. *Am J Respir Cell Mol Biol*. 2015 Sep 22;54(4):515–23.
- 774 33. Galani IE, Triantafyllia V, Eleminiadou E-E, Koltsida O, Stavropoulos A, Manioudaki M, et al. Interferon- $\lambda$  Mediates  
775 Non-redundant Front-Line Antiviral Protection against Influenza Virus Infection without Compromising Host  
776 Fitness. *Immunity*. 2017 May;46(5):875-890.e6.
- 777 34. Shirasaki H, Kanaizumi E, Watanabe K, Konno N, Sato J, Narita S, et al. Tumor Necrosis Factor Increases MUC1  
778 mRNA in Cultured Human Nasal Epithelial Cells. *Acta Oto-Laryngologica*. 2003 Apr 1;123(4):524–31.
- 779 35. Konowalchuk JD, Agrawal B. MUC1 mucin is expressed on human T-regulatory cells: Function in both co-  
780 stimulation and co-inhibition. *Cellular Immunology*. 2012 Jan 1;272(2):193–9.
- 781 36. Wykes M, MacDonald KPA, Tran M, Quin RJ, Xing PX, Gendler SJ, et al. MUC1 epithelial mucin (CD227) is expressed  
782 by activated dendritic cells. *Journal of Leukocyte Biology*. 2002;72(4):692–701.
- 783 37. Leong C-F, Raudhawati O, Cheong S-K, Sivagengei K, Hamidah HN. Epithelial membrane antigen (EMA) or MUC1  
784 expression in monocytes and monoblasts. *Pathology*. 2003 Oct 1;35(5):422–7.
- 785 38. Komuro I, Keicho N, Iwamoto A, Akagawa KS. Human alveolar macrophages and granulocyte-macrophage colony-  
786 stimulating factor-induced monocyte-derived macrophages are resistant to H<sub>2</sub>O<sub>2</sub> via their high basal and inducible  
787 levels of catalase activity. *J Biol Chem*. 2001 Jun 29;276(26):24360–4.
- 788 39. Lescoat A, Ballerie A, Augagneur Y, Morzadec C, Vernhet L, Fardel O, et al. Distinct Properties of Human M-CSF and  
789 GM-CSF Monocyte-Derived Macrophages to Simulate Pathological Lung Conditions In Vitro: Application to  
790 Systemic and Inflammatory Disorders with Pulmonary Involvement. *Int J Mol Sci*. 2018 Mar 17;19(3).
- 791 40. Winkler AR, Nocka KH, Sulahian TH, Kobzik L, Williams CMM. In Vitro Modeling of Human Alveolar Macrophage  
792 Smoke Exposure: Enhanced Inflammation and Impaired Function. *Experimental Lung Research*. 2008 Jan  
793 1;34(9):599–629.
- 794 41. Thompson CI, Barclay WS, Zambon MC, Pickles RJ. Infection of Human Airway Epithelium by Human and Avian  
795 Strains of Influenza A Virus. *Journal of Virology*. 2006 Aug 15;80(16):8060–8.
- 796 42. Walters MS, Gomi K, Ashbridge B, Moore MAS, Arbelaez V, Heldrich J, et al. Generation of a human airway  
797 epithelium derived basal cell line with multipotent differentiation capacity. *Respir Res*. 2013 Dec 3;14:135.
- 798 43. Kato K, Lillehoj EP, Lu W, Kim KC. MUC1: The First Respiratory Mucin with an Anti-Inflammatory Function. *J Clin  
799 Med*. 2017 Nov 29;6(12).
- 800 44. Kato K, Lillehoj EP, Kim KC. MUC1 Regulates Epithelial Inflammation and Apoptosis by PolyI:C through Inhibition of  
801 Toll/IL-1 Receptor-Domain-Containing Adapter-Inducing IFN- $\beta$  (TRIF) Recruitment to Toll-like Receptor 3. *Am J  
802 Respir Cell Mol Biol*. 2014 Apr 2;51(3):446–54.
- 803 45. Zhang H, Ji J, Liu Q, Xu S. MUC1 downregulation promotes TNF- $\alpha$ -induced necroptosis in human bronchial  
804 epithelial cells via regulation of the RIPK1/RIPK3 pathway. *J Cell Physiol*. 2019 Jan 21;
- 805 46. Nath S, Mukherjee P. Muc1: a multifaceted oncoprotein with a key role in cancer progression. *Trends Mol Med*.  
806 2014 Jun;20(6):332–42.
- 807 47. Palmal-Pallag T, Khodabukus N, Kinarsky L, Leir S-H, Sherman S, Hollingsworth MA, et al. The role of the SEA (sea  
808 urchin sperm protein, enterokinase and agrin) module in cleavage of membrane-tethered mucins. *The FEBS  
809 Journal*. 2005;272(11):2901–11.

- 810 48. Kim KC, Wasano K, Niles RM, Schuster JE, Stone PJ, Brody JS. Human neutrophil elastase releases cell surface  
811 mucins from primary cultures of hamster tracheal epithelial cells. *Proceedings of the National Academy of*  
812 *Sciences*. 1987 Dec 1;84(24):9304–8.
- 813 49. Altschuler Y, Kinlough CL, Poland PA, Bruns JB, Apodaca G, Weisz OA, et al. Clathrin-mediated Endocytosis of MUC1  
814 Is Modulated by Its Glycosylation State. *MBoC*. 2000 Mar 1;11(3):819–31.
- 815 50. Yang X, Steukers L, Forier K, Xiong R, Braeckmans K, Reeth KV, et al. A Beneficiary Role for Neuraminidase in  
816 Influenza Virus Penetration through the Respiratory Mucus. *PLOS ONE*. 2014 Oct 15;9(10):e110026.
- 817 51. Mahanta S, Fessler SP, Park J, Bamdad C. A minimal fragment of MUC1 mediates growth of cancer cells. *PLoS One*.  
818 2008 Apr 30;3(4):e2054.
- 819 52. McGill J, Heusel JW, Legge KL. Innate immune control and regulation of influenza virus infections. *J Leukoc Biol*.  
820 2009 Oct;86(4):803–12.
- 821 53. Chu HW, Rios C, Huang C, Wesolowska-Andersen A, Burchard EG, O'Connor BP, et al. CRISPR–Cas9-mediated gene  
822 knockout in primary human airway epithelial cells reveals a proinflammatory role for MUC18. *Gene Therapy*. 2015  
823 Oct;22(10):822–9.
- 824 54. Koh KD, Siddiqui S, Cheng D, Bonser LR, Sun DI, Zlock LT, et al. Efficient RNP-directed Human Gene Targeting  
825 Reveals SPDEF Is Required for IL-13-induced Mucostasis. *Am J Respir Cell Mol Biol*. 2020 Mar;62(3):373–81.
- 826 55. Iverson E, Kaler L, Agostino EL, Song D, Duncan GA, Scull MA. Leveraging 3D Model Systems to Understand Viral  
827 Interactions with the Respiratory Mucosa. *Viruses*. 2020 Dec;12(12):1425.
- 828 56. Dou D, Hernández-Neuta I, Wang H, Östbye H, Qian X, Thiele S, et al. Analysis of IAV Replication and Co-infection  
829 Dynamics by a Versatile RNA Viral Genome Labeling Method. *Cell Reports*. 2017 Jul 5;20(1):251–63.
- 830 57. Rust MJ, Lakadamyali M, Zhang F, Zhuang X. Assembly of endocytic machinery around individual influenza viruses  
831 during viral entry. *Nat Struct Mol Biol*. 2004 Jun;11(6):567–73.
- 832 58. Zhou X, Zhao M, Liu Y, Chen Q, Shen L. Statistical Binding Matching between Influenza A Virus and Dynamic Glycan  
833 Clusters Determines Its Adhesion onto Lipid Membranes. *Langmuir*. 2020 Dec 12;acs.langmuir.0c02047.
- 834 59. Ohuchi M, Asaoka N, Sakai T, Ohuchi R. Roles of neuraminidase in the initial stage of influenza virus infection.  
835 *Microbes and Infection*. 2006 Apr;8(5):1287–93.
- 836 60. Vahey MD, Fletcher DA. Influenza A virus surface proteins are organized to help penetrate host mucus.  
837 Chakraborty AK, Neher RA, Neher RA, Zanin M, editors. *eLife*. 2019 May 14;8:e43764.
- 838 61. Delaveris CS, Webster ER, Banik SM, Boxer SG, Bertozzi CR. Membrane-tethered mucin-like polypeptides sterically  
839 inhibit binding and slow fusion kinetics of influenza A virus. *Proc Natl Acad Sci USA*. 2020 Jun 9;117(23):12643–50.
- 840 62. Barclay WS, Jones IM, Osborn HMI, Phillipson L, Ren J, Talevera GA, et al. Probing the receptor interactions of an  
841 H5 avian influenza virus using a baculovirus expression system and functionalised poly(acrylic acid) ligands.  
842 *Bioorganic & Medicinal Chemistry*. 2007 Jun 15;15(12):4038–47.
- 843 63. Martínez-Sobrido L, García-Sastre A. Generation of Recombinant Influenza Virus from Plasmid DNA. *JoVE*. 2010  
844 Aug 3;(42):2057.
- 845 64. Duncan GA, Jung J, Joseph A, Thaxton AL, West NE, Boyle MP, et al. Microstructural alterations of sputum in cystic  
846 fibrosis lung disease. *JCI Insight*. 2016 Nov 3;1(18):e88198.

- 847 65. Sanjana NE, Shalem O, Zhang F. Improved vectors and genome-wide libraries for CRISPR screening. *Nat Methods*.  
848 2014 Aug;11(8):783–4.
- 849 66. Stewart SA, Dykxhoorn DM, Palliser D, Mizuno H, Yu EY, An DS, et al. Lentivirus-delivered stable gene silencing by  
850 RNAi in primary cells. *RNA*. 2003 Apr;9(4):493–501.
- 851
